# Supplementary material for: Fairness and efficiency considerations in COVID-19 vaccine allocation strategies: a case study comparing front-line workers and 65-74 year olds in the United States
Source: bioRxiv or medRxiv preprint supplement (doi:10.1101/2022.02.03.22270414), 2022-09-28
Supplement: Supplementary file [file media-1.pdf]

# Equitable COVID-19 vaccine prioritization: front-line workers or 65-74 year olds?

## Supplementary Material

Eva Rumpler MS<sup>1\*</sup>, Justin M. Feldman ScD<sup>2</sup>, Mary T. Bassett MD<sup>2</sup>, Marc Lipsitch DPhil<sup>1</sup>

<sup>1</sup> Center for Communicable Disease Dynamics, Department of Epidemiology, Harvard T.H. Chan School of Public Health, 677 Huntington Ave, Boston, MA 02115, USA.

<sup>2</sup> Harvard FXB Center for Health and Human Rights, 651 Huntington Ave, Boston, MA 02115, USA.

\* Corresponding author, email: [erumpler@hsph.harvard.edu](mailto:erumpler@hsph.harvard.edu)

# 1 Supplementary Material

Supplementary Figure 1: Proportion of adults aged 16-64, front-line workers aged 16-64, and older individuals aged 65-74 in each race/ethnicity categories .

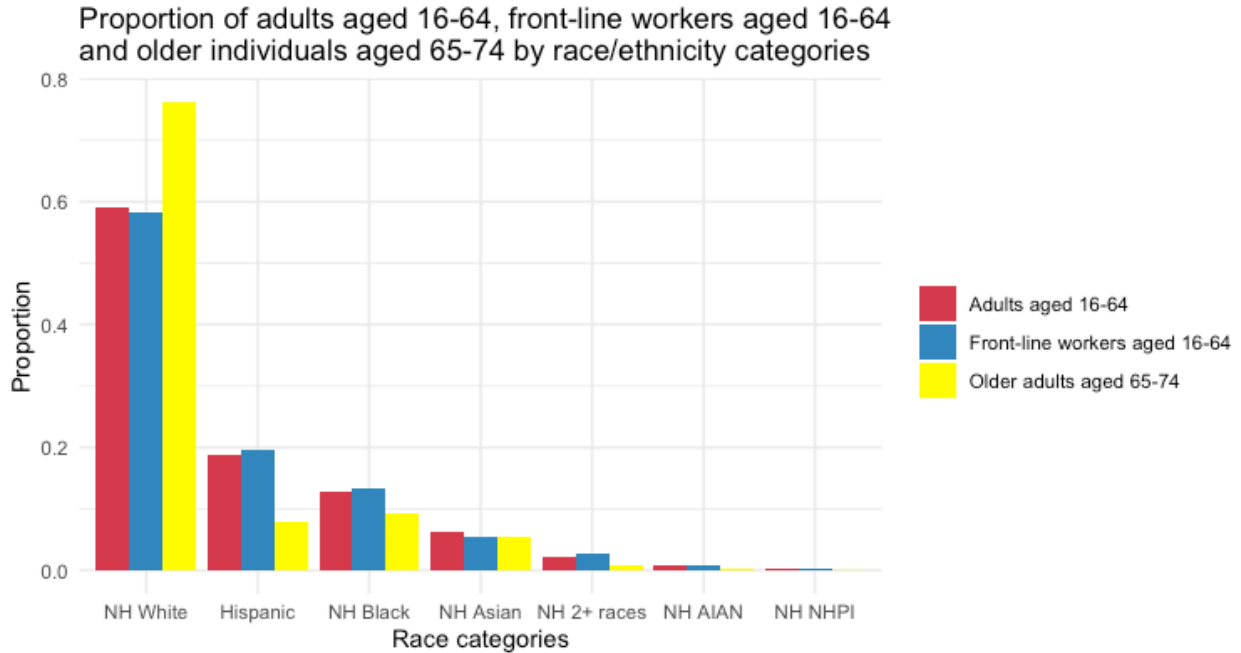

Supplementary Figure 2: Proportion of adults and front-line workers in each age subcategories between 16 and 64.

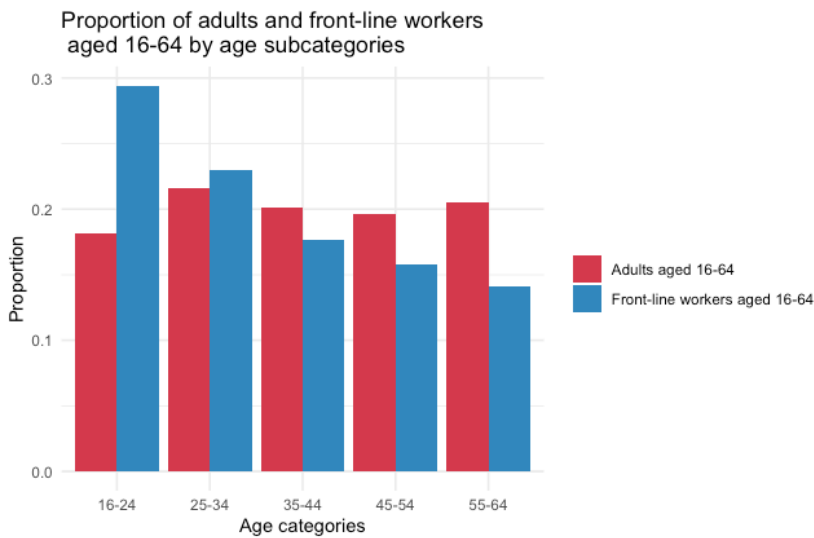

Supplementary Figure 3: COVID-19 mortality rates per 100,000 by age and race/ethnicity categories in the US in 2020.

COVID-19 mortality rates per 100,000 by age and race/ethnicity categories in the US in 2020

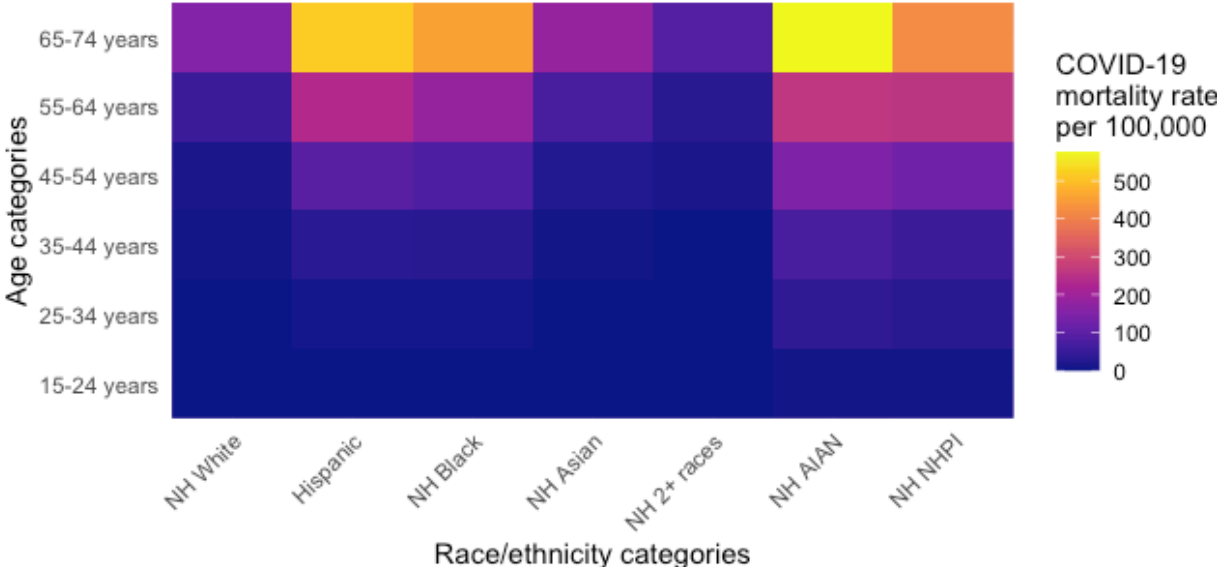

*Supplementary Table 1: List of occupations included in the definition of front-line occupations. For each race, proportion of front-line workers in each occupation.*

| Occupation                                     | Category      | All races | Non-Hispanic White | Hispanic | Non-Hispanic Black | Non-Hispanic Asian | Non-Hispanic Two or more races | Non-Hispanic American Indian or Alaska Native | Non-Hispanic Native Hawaiian or other Pacific Islander |
|------------------------------------------------|---------------|-----------|--------------------|----------|--------------------|--------------------|--------------------------------|-----------------------------------------------|--------------------------------------------------------|
| Cashiers                                       | Sales         | 14.01     | 11.72              | 16.30    | 19.11              | 15.76              | 16.27                          | 18.95                                         | 21.36                                                  |
| Retail Salespersons                            | Sales         | 12.25     | 12.41              | 12.20    | 11.57              | 12.00              | 13.99                          | 9.37                                          | 8.50                                                   |
| First-Line Supervisors Of Retail Sales Workers | Sales         | 10.47     | 11.89              | 8.18     | 7.73               | 11.42              | 8.48                           | 9.11                                          | 9.07                                                   |
| Elementary And Middle School Teachers          | Education     | 10.43     | 13.21              | 5.68     | 7.98               | 6.27               | 6.15                           | 8.07                                          | 3.82                                                   |
| Cooks                                          | Food industry | 9.56      | 7.15               | 14.62    | 12.77              | 8.86               | 9.13                           | 14.07                                         | 10.28                                                  |
| Waiters And Waitresses                         | Food industry | 8.93      | 8.99               | 9.73     | 6.19               | 11.41              | 10.50                          | 8.74                                          | 8.67                                                   |
| Secondary School Teachers                      | Education     | 4.31      | 5.83               | 2.01     | 2.12               | 2.56               | 3.25                           | 2.69                                          | 1.29                                                   |
| Food Preparation Workers                       | Food industry | 4.22      | 3.65               | 5.62     | 4.24               | 4.65               | 4.78                           | 5.60                                          | 5.75                                                   |

| Occupation                                                     | Category       | All races | Non-Hispanic White | Hispanic | Non-Hispanic Black | Non-Hispanic Asian | Non-Hispanic Two or more races | Non-Hispanic American Indian or Alaska Native | Non-Hispanic Native Hawaiian or other Pacific Islander |
|----------------------------------------------------------------|----------------|-----------|--------------------|----------|--------------------|--------------------|--------------------------------|-----------------------------------------------|--------------------------------------------------------|
| Preschool And Kindergarten Teachers                            | Education      | 3.17      | 3.54               | 2.34     | 3.19               | 2.37               | 2.77                           | 2.82                                          | 3.53                                                   |
| Fast Food And Counter Workers                                  | Food industry  | 3.03      | 2.94               | 3.02     | 3.12               | 3.20               | 4.48                           | 2.55                                          | 4.47                                                   |
| First-Line Supervisors Of Food Preparation And Serving Workers | Food industry  | 2.02      | 1.98               | 2.14     | 2.14               | 1.48               | 2.42                           | 1.70                                          | 1.73                                                   |
| Chefs And Head Cooks                                           | Food industry  | 1.86      | 1.40               | 2.16     | 1.83               | 5.85               | 1.69                           | 1.22                                          | 3.79                                                   |
| Bartenders                                                     | Food industry  | 1.74      | 2.20               | 1.32     | 0.66               | 0.86               | 1.94                           | 1.67                                          | 0.46                                                   |
| Taxi Drivers                                                   | Transportation | 1.71      | 1.03               | 2.14     | 3.14               | 4.29               | 1.66                           | 0.73                                          | 0.92                                                   |
| Dishwashers                                                    | Food industry  | 1.60      | 1.26               | 2.15     | 2.29               | 1.01               | 2.09                           | 3.79                                          | 2.72                                                   |
| Hosts And Hostesses, Restaurant, Lounge, And Coffee Shop       | Food industry  | 1.49      | 1.53               | 1.55     | 1.14               | 1.22               | 2.57                           | 0.96                                          | 1.34                                                   |
| Special                                                        | Education      | 1.47      | 1.94               | 0.70     | 1.09               | 0.53               | 0.87                           | 1.17                                          | 0.50                                                   |

| Occupation                                                    | Category       | All races | Non-Hispanic White | Hispanic | Non-Hispanic Black | Non-Hispanic Asian | Non-Hispanic Two or more races | Non-Hispanic American Indian or Alaska Native | Non-Hispanic Native Hawaiian or other Pacific Islander |
|---------------------------------------------------------------|----------------|-----------|--------------------|----------|--------------------|--------------------|--------------------------------|-----------------------------------------------|--------------------------------------------------------|
| Education Teachers                                            |                |           |                    |          |                    |                    |                                |                                               |                                                        |
| Dining Room And Cafeteria Attendants And Bartender Helpers    | Food industry  | 1.40      | 1.20               | 2.16     | 1.21               | 1.27               | 1.35                           | 1.22                                          | 0.74                                                   |
| Bus Drivers, School                                           | Transportation | 0.91      | 0.94               | 0.67     | 1.48               | 0.25               | 0.46                           | 1.11                                          | 1.40                                                   |
| Butchers And Other Meat, Poultry, And Fish Processing Workers | Food industry  | 0.85      | 0.63               | 1.39     | 1.19               | 0.62               | 0.41                           | 0.66                                          | 2.30                                                   |
| Bus Drivers, Transit And Intercity                            | Transportation | 0.83      | 0.51               | 0.83     | 2.36               | 0.57               | 0.71                           | 0.79                                          | 1.59                                                   |
| Food Servers, Nonrestaurant                                   | Food industry  | 0.74      | 0.65               | 0.64     | 1.10               | 1.13               | 0.88                           | 0.53                                          | 2.14                                                   |
| Aircraft Pilots And Flight Engineers                          | Transportation | 0.68      | 1.00               | 0.23     | 0.13               | 0.29               | 0.75                           | 0.23                                          | 0.98                                                   |

| Occupation                                                               | Category        | All races | Non-Hispanic White | Hispanic | Non-Hispanic Black | Non-Hispanic Asian | Non-Hispanic Two or more races | Non-Hispanic American Indian or Alaska Native | Non-Hispanic Native Hawaiian or other Pacific Islander |
|--------------------------------------------------------------------------|-----------------|-----------|--------------------|----------|--------------------|--------------------|--------------------------------|-----------------------------------------------|--------------------------------------------------------|
| Door-To-Door Sales Workers, News And Street Vendors, And Related Workers | Sales           | 0.46      | 0.48               | 0.53     | 0.32               | 0.26               | 0.57                           | 0.43                                          | 0.29                                                   |
| Parts Salespersons                                                       | Sales           | 0.40      | 0.50               | 0.37     | 0.18               | 0.11               | 0.27                           | 0.15                                          | 0.29                                                   |
| Flight Attendants                                                        | Transportation  | 0.38      | 0.39               | 0.26     | 0.41               | 0.58               | 0.59                           | 0.15                                          | 0.44                                                   |
| Counter And Rental Clerks                                                | Sales           | 0.34      | 0.34               | 0.37     | 0.31               | 0.35               | 0.18                           | 0.69                                          | 0.80                                                   |
| Shuttle Drivers And Chauffeurs                                           | Transportation  | 0.33      | 0.22               | 0.40     | 0.60               | 0.62               | 0.32                           | 0.31                                          | 0.26                                                   |
| Air Traffic Controllers And Airfield Operations Specialists              | Transportation  | 0.15      | 0.18               | 0.11     | 0.10               | 0.05               | 0.27                           | 0.02                                          | NA                                                     |
| Morticians, Undertakers, And Funeral Arrangers                           | Funeral workers | 0.12      | 0.15               | 0.05     | 0.13               | 0.06               | 0.09                           | 0.01                                          | 0.22                                                   |

| Occupation                                                             | Category        | All races | Non-Hispanic White | Hispanic | Non-Hispanic Black | Non-Hispanic Asian | Non-Hispanic Two or more races | Non-Hispanic American Indian or Alaska Native | Non-Hispanic Native Hawaiian or other Pacific Islander |
|------------------------------------------------------------------------|-----------------|-----------|--------------------|----------|--------------------|--------------------|--------------------------------|-----------------------------------------------|--------------------------------------------------------|
| Food Preparation and Serving Related Workers, All Other                | Food industry   | 0.06      | 0.04               | 0.08     | 0.06               | 0.12               | 0.07                           | 0.17                                          | 0.06                                                   |
| Embalmers, Crematory Operators And Funeral Attendants                  | Funeral workers | 0.04      | 0.05               | 0.03     | 0.05               | 0.01               | 0.01                           | 0.03                                          | 0.27                                                   |
| Ambulance Drivers And Attendants, Except Emergency Medical Technicians | Transportation  | 0.03      | 0.03               | 0.01     | 0.03               | 0.01               | 0.01                           | 0.30                                          | NA                                                     |



*Supplementary Table 2: Expectation of life at age categories i2/3/22 7:40:00 PMin the USA in 2019 from the WHO GlobalHealth Observatory <sup>1</sup>.*

| <b>Age category</b> | <b>SLE (years)</b> |
|---------------------|--------------------|
| 15-24               | 61.67              |
| 25-34               | 52.15              |
| 35-44               | 42.84              |
| 45-54               | 33.70              |
| 55-64               | 25.14              |
| 65-74               | 17.42              |

*Supplementary Table 3: Proportion of doses allocated under policy S and policy F, and mortality rates per100,000 individuals for individuals 65-74 year olds and for front-line workers, per US state and race/ethnicity categories.*

*"NH" stands for "Non-Hispanic", "2+ races" stands for "Two or more races", "Native" stands for "American Indian or Alaska Native", "NHPI" stands for "Native Hawaiian or Other Pacific Islander".*

| <b>State</b> | <b>Race/ethnicity</b> | <b>Proportion of doses received under policy S</b> | <b>Proportion of doses received under policy F</b> | <b>Mortality rate among 65-74 year olds</b> | <b>Mortality rate among front-line workers</b> |
|--------------|-----------------------|----------------------------------------------------|----------------------------------------------------|---------------------------------------------|------------------------------------------------|
| Alabama      | All races             | 1.00                                               | 1.00                                               | 53.19                                       | 9.01                                           |
| Alabama      | NH White              | 0.74                                               | 0.61                                               | 44.76                                       | 6.09                                           |
| Alabama      | Hispanic              | 0.01                                               | 0.05                                               | 58.04                                       | 12.07                                          |
| Alabama      | NH Black              | 0.22                                               | 0.31                                               | 86.25                                       | 14.47                                          |
| Alabama      | NH Asian              | 0.01                                               | 0.01                                               | 17.21                                       | 12.63                                          |
| Alabama      | NH 2+ races           | 0.01                                               | 0.02                                               | 0.00                                        | 3.32                                           |
| Alabama      | NH Native             | 0.00                                               | 0.00                                               | 44.03                                       | 37.22                                          |
| Alabama      | NH NHPI               | 0.00                                               | 0.00                                               | 0.00                                        | 0.00                                           |
| Alaska       | All races             | 1.00                                               | 1.00                                               | 13.63                                       | 4.58                                           |
| Alaska       | NH White              | 0.73                                               | 0.64                                               | 4.17                                        | 0.77                                           |
| Alaska       | Hispanic              | 0.04                                               | 0.07                                               | 0.00                                        | 2.03                                           |
| Alaska       | NH Black              | 0.01                                               | 0.04                                               | 96.06                                       | 5.90                                           |
| Alaska       | NH Asian              | 0.07                                               | 0.06                                               | 19.66                                       | 14.68                                          |

|            |             |      |      |        |        |
|------------|-------------|------|------|--------|--------|
| Alaska     | NH 2+ races | 0.02 | 0.10 | 72.74  | 2.95   |
| Alaska     | NH Native   | 0.09 | 0.09 | 54.24  | 10.16  |
| Alaska     | NH NHPI     | 0.03 | 0.01 | 51.39  | 142.92 |
| Arizona    | All races   | 1.00 | 1.00 | 45.31  | 10.86  |
| Arizona    | NH White    | 0.77 | 0.54 | 25.91  | 4.30   |
| Arizona    | Hispanic    | 0.14 | 0.31 | 117.78 | 15.09  |
| Arizona    | NH Black    | 0.03 | 0.05 | 60.59  | 10.74  |
| Arizona    | NH Asian    | 0.02 | 0.03 | 33.52  | 6.67   |
| Arizona    | NH 2+ races | 0.01 | 0.02 | 57.01  | 4.67   |
| Arizona    | NH Native   | 0.02 | 0.04 | 217.62 | 64.83  |
| Arizona    | NH NHPI     | 0.00 | 0.00 | 148.07 | 45.21  |
| Arkansas   | All races   | 1.00 | 1.00 | 41.42  | 7.06   |
| Arkansas   | NH White    | 0.83 | 0.72 | 35.84  | 5.03   |
| Arkansas   | Hispanic    | 0.02 | 0.07 | 112.61 | 11.76  |
| Arkansas   | NH Black    | 0.13 | 0.15 | 59.06  | 9.71   |
| Arkansas   | NH Asian    | 0.01 | 0.02 | 108.54 | 14.29  |
| Arkansas   | NH 2+ races | 0.01 | 0.02 | 26.70  | 7.03   |
| Arkansas   | NH Native   | 0.00 | 0.00 | 62.26  | 11.89  |
| Arkansas   | NH NHPI     | 0.00 | 0.01 | NA     | NA     |
| California | All races   | 1.00 | 1.00 | 29.70  | 5.86   |
| California | NH White    | 0.55 | 0.35 | 14.09  | 2.32   |
| California | Hispanic    | 0.22 | 0.42 | 73.79  | 9.55   |
| California | NH Black    | 0.05 | 0.05 | 42.72  | 7.29   |
| California | NH Asian    | 0.16 | 0.13 | 18.25  | 3.24   |
| California | NH 2+ races | 0.01 | 0.03 | 15.03  | 1.29   |
| California | NH Native   | 0.00 | 0.00 | 45.70  | 7.25   |
| California | NH NHPI     | 0.00 | 0.00 | 74.98  | 21.21  |
| Colorado   | All races   | 1.00 | 1.00 | 24.82  | 3.95   |
| Colorado   | NH White    | 0.82 | 0.66 | 17.17  | 1.98   |

|                      |             |      |      |        |        |
|----------------------|-------------|------|------|--------|--------|
| Colorado             | Hispanic    | 0.11 | 0.22 | 66.35  | 8.76   |
| Colorado             | NH Black    | 0.03 | 0.04 | 59.12  | 7.95   |
| Colorado             | NH Asian    | 0.02 | 0.04 | 44.15  | 4.83   |
| Colorado             | NH 2+ races | 0.01 | 0.03 | 14.54  | 2.29   |
| Colorado             | NH Native   | 0.00 | 0.01 | 95.11  | 22.97  |
| Colorado             | NH NHPI     | 0.00 | 0.00 | 193.81 | 24.83  |
| Connecticut          | All races   | 1.00 | 1.00 | 38.73  | 5.41   |
| Connecticut          | NH White    | 0.82 | 0.63 | 30.19  | 3.61   |
| Connecticut          | Hispanic    | 0.08 | 0.20 | 71.40  | 8.23   |
| Connecticut          | NH Black    | 0.07 | 0.11 | 114.46 | 12.96  |
| Connecticut          | NH Asian    | 0.03 | 0.05 | 19.94  | 4.43   |
| Connecticut          | NH 2+ races | 0.01 | 0.02 | 0.00   | 0.00   |
| Connecticut          | NH Native   | 0.00 | 0.00 | 67.85  | 0.00   |
| Connecticut          | NH NHPI     | 0.00 | 0.00 | 0.00   | NA     |
| Delaware             | All races   | 1.00 | 1.00 | 21.57  | 7.35   |
| Delaware             | NH White    | 0.78 | 0.62 | 17.92  | 4.88   |
| Delaware             | Hispanic    | 0.03 | 0.10 | 49.51  | 13.22  |
| Delaware             | NH Black    | 0.15 | 0.20 | 39.58  | 10.38  |
| Delaware             | NH Asian    | 0.03 | 0.05 | 0.00   | 7.10   |
| Delaware             | NH 2+ races | 0.00 | 0.03 | 0.00   | 3.61   |
| Delaware             | NH Native   | 0.00 | 0.00 | 0.00   | 169.49 |
| Delaware             | NH NHPI     | 0.00 | 0.00 | NA     | NA     |
| District of Columbia | All races   | 1.00 | 1.00 | 94.56  | 15.11  |
| District of Columbia | NH White    | 0.34 | 0.22 | 22.64  | 2.26   |

|                      |             |      |      |        |        |
|----------------------|-------------|------|------|--------|--------|
| District of Columbia | Hispanic    | 0.07 | 0.17 | 185.40 | 30.03  |
| District of Columbia | NH Black    | 0.54 | 0.56 | 128.51 | 21.40  |
| District of Columbia | NH Asian    | 0.03 | 0.03 | 58.45  | 9.08   |
| District of Columbia | NH 2+ races | 0.01 | 0.02 | 176.92 | 0.00   |
| District of Columbia | NH Native   | 0.00 | 0.00 | 0.00   | 343.27 |
| District of Columbia | NH NHPI     | 0.00 | 0.00 | NA     | NA     |
| Florida              | All races   | 1.00 | 1.00 | 35.18  | 6.68   |
| Florida              | NH White    | 0.71 | 0.50 | 23.74  | 3.91   |
| Florida              | Hispanic    | 0.16 | 0.27 | 59.59  | 8.31   |
| Florida              | NH Black    | 0.10 | 0.18 | 82.82  | 13.42  |
| Florida              | NH Asian    | 0.02 | 0.03 | 25.28  | 5.56   |
| Florida              | NH 2+ races | 0.01 | 0.02 | 12.24  | 2.39   |
| Florida              | NH Native   | 0.00 | 0.00 | 19.82  | 21.12  |
| Florida              | NH NHPI     | 0.00 | 0.00 | 95.51  | 34.93  |
| Georgia              | All races   | 1.00 | 1.00 | 44.72  | 7.10   |
| Georgia              | NH White    | 0.67 | 0.50 | 33.28  | 4.59   |
| Georgia              | Hispanic    | 0.03 | 0.09 | 83.79  | 10.74  |
| Georgia              | NH Black    | 0.26 | 0.36 | 71.84  | 10.10  |
| Georgia              | NH Asian    | 0.03 | 0.04 | 29.88  | 3.63   |
| Georgia              | NH 2+ races | 0.01 | 0.02 | 12.85  | 2.64   |
| Georgia              | NH Native   | 0.00 | 0.00 | 0.00   | 14.53  |
| Georgia              | NH NHPI     | 0.00 | 0.00 | 144.85 | 0.00   |
| Hawaii               | All races   | 1.00 | 1.00 | 9.86   | 3.65   |
| Hawaii               | NH White    | 0.30 | 0.19 | 2.04   | 1.37   |
| Hawaii               | Hispanic    | 0.03 | 0.11 | 18.78  | 6.23   |
| Hawaii               | NH Black    | 0.01 | 0.01 | 67.32  | 13.66  |
| Hawaii               | NH Asian    | 0.47 | 0.39 | 8.96   | 3.13   |
| Hawaii               | NH 2+       | 0.11 | 0.18 | 5.73   | 2.15   |

|          | racess      |      |      |         |       |
|----------|-------------|------|------|---------|-------|
| Hawaii   | NH Native   | 0.00 | 0.00 | 0.00    | 0.00  |
| Hawaii   | NH NHPI     | 0.08 | 0.11 | 40.71   | 10.30 |
| Idaho    | All races   | 1.00 | 1.00 | 27.82   | 4.33  |
| Idaho    | NH White    | 0.94 | 0.81 | 23.15   | 2.97  |
| Idaho    | Hispanic    | 0.04 | 0.14 | 116.98  | 7.94  |
| Idaho    | NH Black    | 0.00 | 0.01 | 2304.19 | 21.49 |
| Idaho    | NH Asian    | 0.01 | 0.01 | 66.57   | 23.22 |
| Idaho    | NH 2+ races | 0.01 | 0.02 | 36.07   | 7.73  |
| Idaho    | NH Native   | 0.01 | 0.01 | 69.01   | 44.22 |
| Idaho    | NH NHPI     | 0.00 | 0.00 | NA      | 0.00  |
| Illinois | All races   | 1.00 | 1.00 | 45.48   | 7.46  |
| Illinois | NH White    | 0.74 | 0.58 | 31.36   | 3.48  |
| Illinois | Hispanic    | 0.08 | 0.21 | 113.39  | 15.68 |
| Illinois | NH Black    | 0.13 | 0.13 | 88.49   | 12.88 |
| Illinois | NH Asian    | 0.05 | 0.05 | 38.76   | 5.89  |
| Illinois | NH 2+ races | 0.01 | 0.02 | 14.81   | 3.81  |
| Illinois | NH Native   | 0.00 | 0.00 | 104.39  | 23.43 |
| Illinois | NH NHPI     | 0.00 | 0.00 | NA      | 0.00  |
| Indiana  | All races   | 1.00 | 1.00 | 40.50   | 5.21  |
| Indiana  | NH White    | 0.89 | 0.78 | 36.02   | 4.14  |
| Indiana  | Hispanic    | 0.02 | 0.08 | 93.59   | 7.54  |
| Indiana  | NH Black    | 0.07 | 0.09 | 83.19   | 11.74 |
| Indiana  | NH Asian    | 0.01 | 0.02 | 26.18   | 3.83  |
| Indiana  | NH 2+ races | 0.01 | 0.02 | 18.59   | 2.49  |
| Indiana  | NH Native   | 0.00 | 0.00 | 70.01   | 21.07 |
| Indiana  | NH NHPI     | 0.00 | 0.00 | 219.54  | NA    |
| Iowa     | All races   | 1.00 | 1.00 | 35.95   | 6.29  |
| Iowa     | NH White    | 0.95 | 0.84 | 33.18   | 5.06  |
| Iowa     | Hispanic    | 0.01 | 0.06 | 99.08   | 9.69  |

|           |             |      |      |         |        |
|-----------|-------------|------|------|---------|--------|
| Iowa      | NH Black    | 0.02 | 0.05 | 84.46   | 16.58  |
| Iowa      | NH Asian    | 0.01 | 0.03 | 80.21   | 4.49   |
| Iowa      | NH 2+ races | 0.01 | 0.01 | 42.86   | 7.13   |
| Iowa      | NH Native   | 0.00 | 0.00 | 198.90  | 106.23 |
| Iowa      | NH NHPI     | 0.00 | 0.00 | 1294.54 | NA     |
| Kansas    | All races   | 1.00 | 1.00 | 32.44   | 5.70   |
| Kansas    | NH White    | 0.87 | 0.72 | 27.59   | 3.93   |
| Kansas    | Hispanic    | 0.05 | 0.13 | 84.59   | 10.28  |
| Kansas    | NH Black    | 0.05 | 0.06 | 50.44   | 12.21  |
| Kansas    | NH Asian    | 0.02 | 0.04 | 39.91   | 6.43   |
| Kansas    | NH 2+ races | 0.01 | 0.04 | 34.42   | 2.77   |
| Kansas    | NH Native   | 0.01 | 0.01 | 107.70  | 43.20  |
| Kansas    | NH NHPI     | 0.00 | 0.00 | NA      | NA     |
| Kentucky  | All races   | 1.00 | 1.00 | 30.25   | 3.87   |
| Kentucky  | NH White    | 0.89 | 0.83 | 28.01   | 3.24   |
| Kentucky  | Hispanic    | 0.01 | 0.04 | 48.67   | 12.73  |
| Kentucky  | NH Black    | 0.07 | 0.09 | 57.12   | 6.12   |
| Kentucky  | NH Asian    | 0.01 | 0.02 | 21.63   | 10.31  |
| Kentucky  | NH 2+ races | 0.01 | 0.02 | 0.00    | 0.00   |
| Kentucky  | NH Native   | 0.00 | 0.00 | 141.86  | 0.00   |
| Kentucky  | NH NHPI     | 0.00 | 0.00 | 0.00    | 0.00   |
| Louisiana | All races   | 1.00 | 1.00 | 62.65   | 10.46  |
| Louisiana | NH White    | 0.68 | 0.53 | 44.08   | 5.58   |
| Louisiana | Hispanic    | 0.03 | 0.06 | 65.91   | 12.53  |
| Louisiana | NH Black    | 0.27 | 0.37 | 111.50  | 18.58  |
| Louisiana | NH Asian    | 0.01 | 0.02 | 16.70   | 11.58  |
| Louisiana | NH 2+ races | 0.01 | 0.02 | 25.93   | 0.00   |
| Louisiana | NH Native   | 0.00 | 0.00 | 51.55   | 30.88  |
| Louisiana | NH NHPI     | 0.00 | 0.00 | NA      | NA     |

|               |             |      |      |       |       |
|---------------|-------------|------|------|-------|-------|
| Maine         | All races   | 1.00 | 1.00 | 6.38  | 1.23  |
| Maine         | NH White    | 0.97 | 0.91 | 5.36  | 0.87  |
| Maine         | Hispanic    | 0.01 | 0.03 | 62.16 | 0.00  |
| Maine         | NH Black    | 0.01 | 0.01 | 77.83 | 32.56 |
| Maine         | NH Asian    | 0.01 | 0.03 | 0.00  | 0.00  |
| Maine         | NH 2+ races | 0.00 | 0.02 | 87.37 | 0.00  |
| Maine         | NH Native   | 0.01 | 0.01 | 0.00  | 0.00  |
| Maine         | NH NHPI     | 0.00 | 0.00 | NA    | NA    |
| Maryland      | All races   | 1.00 | 1.00 | 37.37 | 6.58  |
| Maryland      | NH White    | 0.62 | 0.48 | 23.28 | 2.81  |
| Maryland      | Hispanic    | 0.04 | 0.11 | 85.40 | 18.49 |
| Maryland      | NH Black    | 0.26 | 0.31 | 66.48 | 9.16  |
| Maryland      | NH Asian    | 0.06 | 0.07 | 26.28 | 4.88  |
| Maryland      | NH 2+ races | 0.01 | 0.03 | 11.87 | 1.82  |
| Maryland      | NH Native   | 0.00 | 0.00 | 49.31 | 0.00  |
| Maryland      | NH NHPI     | 0.00 | 0.00 | NA    | NA    |
| Massachusetts | All races   | 1.00 | 1.00 | 34.49 | 4.68  |
| Massachusetts | NH White    | 0.85 | 0.68 | 29.96 | 3.59  |
| Massachusetts | Hispanic    | 0.06 | 0.15 | 65.38 | 7.01  |
| Massachusetts | NH Black    | 0.05 | 0.08 | 81.85 | 10.68 |
| Massachusetts | NH Asian    | 0.04 | 0.06 | 35.67 | 3.60  |
| Massachusetts | NH 2+ races | 0.01 | 0.02 | 15.82 | 2.90  |
| Massachusetts | NH Native   | 0.00 | 0.00 | 66.73 | 7.02  |
| Massachusetts | NH NHPI     | 0.00 | 0.00 | 0.00  | 0.00  |
| Michigan      | All races   | 1.00 | 1.00 | 43.89 | 6.37  |
| Michigan      | NH White    | 0.84 | 0.73 | 31.60 | 3.94  |

|             |             |      |      |        |        |
|-------------|-------------|------|------|--------|--------|
| Michigan    | Hispanic    | 0.02 | 0.05 | 69.59  | 8.83   |
| Michigan    | NH Black    | 0.11 | 0.15 | 137.70 | 19.94  |
| Michigan    | NH Asian    | 0.02 | 0.03 | 30.74  | 1.85   |
| Michigan    | NH 2+ races | 0.01 | 0.03 | 8.51   | 1.30   |
| Michigan    | NH Native   | 0.00 | 0.01 | 81.21  | 10.05  |
| Michigan    | NH NHPI     | 0.00 | 0.00 | NA     | NA     |
| Minnesota   | All races   | 1.00 | 1.00 | 24.04  | 3.45   |
| Minnesota   | NH White    | 0.92 | 0.76 | 20.49  | 2.16   |
| Minnesota   | Hispanic    | 0.01 | 0.08 | 60.41  | 6.03   |
| Minnesota   | NH Black    | 0.03 | 0.07 | 76.44  | 9.46   |
| Minnesota   | NH Asian    | 0.02 | 0.05 | 66.43  | 7.93   |
| Minnesota   | NH 2+ races | 0.01 | 0.03 | 25.93  | 2.31   |
| Minnesota   | NH Native   | 0.01 | 0.01 | 67.44  | 21.21  |
| Minnesota   | NH NHPI     | 0.00 | 0.00 | NA     | NA     |
| Mississippi | All races   | 1.00 | 1.00 | 72.40  | 13.57  |
| Mississippi | NH White    | 0.68 | 0.51 | 51.25  | 7.82   |
| Mississippi | Hispanic    | 0.01 | 0.04 | 50.96  | 14.30  |
| Mississippi | NH Black    | 0.30 | 0.43 | 117.16 | 19.20  |
| Mississippi | NH Asian    | 0.01 | 0.01 | 110.70 | 15.06  |
| Mississippi | NH 2+ races | 0.01 | 0.01 | 52.92  | 6.48   |
| Mississippi | NH Native   | 0.00 | 0.00 | 312.33 | 237.19 |
| Mississippi | NH NHPI     | 0.00 | 0.00 | NA     | NA     |



|          |             |      |      |        |       |
|----------|-------------|------|------|--------|-------|
| pi       |             |      |      |        |       |
| Missouri | All races   | 1.00 | 1.00 | 38.33  | 5.08  |
| Missouri | NH White    | 0.88 | 0.78 | 34.02  | 4.08  |
| Missouri | Hispanic    | 0.01 | 0.05 | 70.77  | 10.10 |
| Missouri | NH Black    | 0.08 | 0.12 | 78.80  | 9.87  |
| Missouri | NH Asian    | 0.01 | 0.02 | 40.53  | 4.21  |
| Missouri | NH 2+ races | 0.01 | 0.03 | 15.69  | 1.58  |
| Missouri | NH Native   | 0.00 | 0.00 | 39.15  | 5.87  |
| Missouri | NH NHPI     | 0.00 | 0.00 | 252.75 | 22.85 |
| Montana  | All races   | 1.00 | 1.00 | 32.72  | 7.56  |
| Montana  | NH White    | 0.92 | 0.84 | 22.11  | 3.52  |
| Montana  | Hispanic    | 0.03 | 0.04 | 49.17  | 12.85 |
| Montana  | NH Black    | 0.00 | 0.01 | 222.08 | 0.00  |
| Montana  | NH Asian    | 0.00 | 0.00 | 159.58 | 49.19 |
| Montana  | NH 2+ races | 0.01 | 0.04 | 48.41  | 5.81  |
| Montana  | NH Native   | 0.03 | 0.06 | 289.65 | 48.07 |
| Montana  | NH NHPI     | 0.00 | 0.00 | NA     | NA    |
| Nebraska | All races   | 1.00 | 1.00 | 35.03  | 6.81  |
| Nebraska | NH White    | 0.91 | 0.76 | 31.00  | 4.87  |
| Nebraska | Hispanic    | 0.04 | 0.11 | 99.06  | 13.49 |
| Nebraska | NH Black    | 0.03 | 0.06 | 66.85  | 14.42 |
| Nebraska | NH Asian    | 0.02 | 0.04 | 28.31  | 8.64  |
| Nebraska | NH 2+ races | 0.01 | 0.02 | 88.86  | 5.09  |
| Nebraska | NH Native   | 0.01 | 0.01 | 60.77  | 36.55 |
| Nebraska | NH NHPI     | 0.00 | 0.00 | NA     | NA    |
| Nevada   | All races   | 1.00 | 1.00 | 46.69  | 10.17 |
| Nevada   | NH White    | 0.68 | 0.44 | 31.62  | 4.93  |
| Nevada   | Hispanic    | 0.12 | 0.32 | 98.95  | 17.38 |
| Nevada   | NH Black    | 0.07 | 0.09 | 71.22  | 15.73 |
| Nevada   | NH Asian    | 0.10 | 0.10 | 68.32  | 9.31  |
| Nevada   | NH 2+       | 0.01 | 0.04 | 23.45  | 6.02  |

|               | racess      |      |      |        |       |
|---------------|-------------|------|------|--------|-------|
| Nevada        | NH Native   | 0.01 | 0.01 | 76.16  | 27.48 |
| Nevada        | NH NHPI     | 0.00 | 0.01 | 74.48  | 61.15 |
| New Hampshire | All races   | 1.00 | 1.00 | 10.14  | 1.87  |
| New Hampshire | NH White    | 0.97 | 0.91 | 9.11   | 1.47  |
| New Hampshire | Hispanic    | 0.01 | 0.03 | 43.21  | 1.90  |
| New Hampshire | NH Black    | 0.01 | 0.01 | 69.51  | 19.71 |
| New Hampshire | NH Asian    | 0.01 | 0.02 | 51.67  | 10.29 |
| New Hampshire | NH 2+ races | 0.00 | 0.02 | 0.00   | 0.00  |
| New Hampshire | NH Native   | 0.00 | 0.00 | 0.00   | 0.00  |
| New Hampshire | NH NHPI     | 0.00 | 0.00 | NA     | NA    |
| New Jersey    | All races   | 1.00 | 1.00 | 72.77  | 15.04 |
| New Jersey    | NH White    | 0.69 | 0.57 | 49.75  | 7.89  |
| New Jersey    | Hispanic    | 0.12 | 0.22 | 148.74 | 25.56 |
| New Jersey    | NH Black    | 0.11 | 0.13 | 141.78 | 26.97 |
| New Jersey    | NH Asian    | 0.08 | 0.07 | 69.27  | 13.42 |
| New Jersey    | NH 2+ races | 0.01 | 0.02 | 50.43  | 6.52  |
| New           | NH          | 0.00 | 0.00 | 90.19  | 0.00  |

|                |             |      |      |         |        |
|----------------|-------------|------|------|---------|--------|
| Jersey         | Native      |      |      |         |        |
| New Jersey     | NH NHPI     | 0.00 | 0.00 | 546.66  | NA     |
| New Mexico     | All races   | 1.00 | 1.00 | 37.59   | 11.03  |
| New Mexico     | NH White    | 0.57 | 0.32 | 13.97   | 3.14   |
| New Mexico     | Hispanic    | 0.33 | 0.53 | 44.99   | 7.82   |
| New Mexico     | NH Black    | 0.02 | 0.03 | 25.23   | 13.15  |
| New Mexico     | NH Asian    | 0.01 | 0.02 | 29.52   | 1.87   |
| New Mexico     | NH 2+ races | 0.01 | 0.02 | 40.56   | 25.18  |
| New Mexico     | NH Native   | 0.06 | 0.09 | 232.49  | 60.79  |
| New Mexico     | NH NHPI     | 0.00 | 0.00 | 0.00    | NA     |
| New York       | All races   | 1.00 | 1.00 | 79.88   | 15.26  |
| New York       | NH White    | 0.67 | 0.52 | 44.78   | 6.33   |
| New York       | Hispanic    | 0.12 | 0.23 | 173.98  | 27.94  |
| New York       | NH Black    | 0.12 | 0.13 | 173.87  | 27.86  |
| New York       | NH Asian    | 0.07 | 0.10 | 97.62   | 19.38  |
| New York       | NH 2+ races | 0.01 | 0.02 | 15.20   | 2.97   |
| New York       | NH Native   | 0.00 | 0.00 | 43.38   | 27.37  |
| New York       | NH NHPI     | 0.00 | 0.00 | 1322.49 | 672.03 |
| North Carolina | All races   | 1.00 | 1.00 | 13.53   | 2.32   |
| North Carolina | NH White    | 0.76 | 0.60 | 8.89    | 1.28   |
| North Carolina | Hispanic    | 0.02 | 0.09 | 53.04   | 5.60   |
| North Carolina | NH Black    | 0.19 | 0.25 | 27.33   | 3.44   |
| North Carolina | NH Asian    | 0.02 | 0.02 | 16.20   | 2.07   |

|                |             |      |      |        |       |
|----------------|-------------|------|------|--------|-------|
| North Carolina | NH 2+ races | 0.01 | 0.03 | 0.00   | 0.00  |
| North Carolina | NH Native   | 0.01 | 0.01 | 23.51  | 2.48  |
| North Carolina | NH NHPI     | 0.00 | 0.00 | 0.00   | 45.96 |
| North Dakota   | All races   | 1.00 | 1.00 | 56.44  | 10.65 |
| North Dakota   | NH White    | 0.94 | 0.86 | 47.79  | 7.16  |
| North Dakota   | Hispanic    | 0.01 | 0.06 | 160.62 | 15.08 |
| North Dakota   | NH Black    | 0.01 | 0.01 | 96.19  | 0.00  |
| North Dakota   | NH Asian    | 0.01 | 0.01 | 235.10 | 0.00  |
| North Dakota   | NH 2+ races | 0.01 | 0.02 | 0.00   | 3.83  |
| North Dakota   | NH Native   | 0.03 | 0.03 | 298.02 | 57.18 |
| North Dakota   | NH NHPI     | 0.00 | 0.00 | 0.00   | NA    |
| Ohio           | All races   | 1.00 | 1.00 | 29.34  | 3.62  |
| Ohio           | NH White    | 0.87 | 0.78 | 26.74  | 3.21  |
| Ohio           | Hispanic    | 0.01 | 0.05 | 37.53  | 4.02  |
| Ohio           | NH Black    | 0.09 | 0.13 | 54.05  | 5.28  |
| Ohio           | NH Asian    | 0.01 | 0.02 | 22.72  | 3.56  |
| Ohio           | NH 2+ races | 0.01 | 0.03 | 11.36  | 2.15  |
| Ohio           | NH Native   | 0.00 | 0.00 | 41.93  | 25.18 |
| Ohio           | NH NHPI     | 0.00 | 0.00 | 0.00   | 0.00  |
| Oklahoma       | All races   | 1.00 | 1.00 | 40.42  | 5.48  |
| Oklahoma       | NH White    | 0.81 | 0.62 | 33.29  | 4.28  |
| Oklahoma       | Hispanic    | 0.03 | 0.13 | 102.06 | 7.88  |
| Oklahoma       | NH Black    | 0.05 | 0.07 | 56.51  | 7.16  |

|              |             |      |      |        |        |
|--------------|-------------|------|------|--------|--------|
| a            |             |      |      |        |        |
| Oklahoma     | NH Asian    | 0.02 | 0.02 | 40.75  | 7.02   |
| Oklahoma     | NH 2+ races | 0.04 | 0.07 | 29.00  | 1.30   |
| Oklahoma     | NH Native   | 0.05 | 0.09 | 105.05 | 12.59  |
| Oklahoma     | NH NHPI     | 0.00 | 0.00 | 626.61 | 149.86 |
| Oregon       | All races   | 1.00 | 1.00 | 7.69   | 2.08   |
| Oregon       | NH White    | 0.89 | 0.72 | 6.15   | 1.11   |
| Oregon       | Hispanic    | 0.04 | 0.15 | 28.16  | 4.73   |
| Oregon       | NH Black    | 0.01 | 0.02 | 19.22  | 8.50   |
| Oregon       | NH Asian    | 0.03 | 0.05 | 13.83  | 2.97   |
| Oregon       | NH 2+ races | 0.01 | 0.04 | 0.00   | 1.71   |
| Oregon       | NH Native   | 0.01 | 0.01 | 18.37  | 12.31  |
| Oregon       | NH NHPI     | 0.00 | 0.00 | 102.99 | 16.21  |
| Pennsylvania | All races   | 1.00 | 1.00 | 34.02  | 4.84   |
| Pennsylvania | NH White    | 0.87 | 0.74 | 26.93  | 3.48   |
| Pennsylvania | Hispanic    | 0.03 | 0.08 | 82.59  | 7.45   |
| Pennsylvania | NH Black    | 0.07 | 0.11 | 98.09  | 12.50  |
| Pennsylvania | NH Asian    | 0.02 | 0.04 | 44.22  | 4.98   |
| Pennsylvania | NH 2+ races | 0.01 | 0.03 | 8.77   | 1.45   |
| Pennsylvania | NH Native   | 0.00 | 0.00 | 92.46  | 0.00   |
| Pennsylvania | NH NHPI     | 0.00 | 0.00 | 0.00   | NA     |
| Rhode Island | All races   | 1.00 | 1.00 | 38.78  | 5.23   |
| Rhode Island | NH White    | 0.86 | 0.75 | 33.00  | 3.45   |

|                |             |      |      |        |       |
|----------------|-------------|------|------|--------|-------|
| Rhode Island   | Hispanic    | 0.07 | 0.13 | 75.62  | 3.48  |
| Rhode Island   | NH Black    | 0.04 | 0.05 | 79.75  | 9.13  |
| Rhode Island   | NH Asian    | 0.02 | 0.04 | 34.05  | 13.15 |
| Rhode Island   | NH 2+ races | 0.01 | 0.03 | 68.51  | 2.93  |
| Rhode Island   | NH Native   | 0.00 | 0.00 | 273.81 | NA    |
| Rhode Island   | NH NHPI     | 0.00 | 0.00 | NA     | NA    |
| South Carolina | All races   | 1.00 | 1.00 | 37.02  | 6.09  |
| South Carolina | NH White    | 0.74 | 0.61 | 26.72  | 3.75  |
| South Carolina | Hispanic    | 0.02 | 0.05 | 49.61  | 9.01  |
| South Carolina | NH Black    | 0.22 | 0.28 | 72.37  | 10.19 |
| South Carolina | NH Asian    | 0.01 | 0.02 | 13.87  | 7.55  |
| South Carolina | NH 2+ races | 0.01 | 0.03 | 27.35  | 0.00  |
| South Carolina | NH Native   | 0.00 | 0.00 | 44.23  | 6.58  |
| South Carolina | NH NHPI     | 0.00 | 0.00 | 0.00   | 4.62  |
| South Dakota   | All races   | 1.00 | 1.00 | 52.60  | 10.19 |
| South Dakota   | NH White    | 0.93 | 0.80 | 41.77  | 5.81  |
| South Dakota   | Hispanic    | 0.01 | 0.06 | 117.05 | 25.60 |
| South Dakota   | NH Black    | 0.01 | 0.03 | 151.87 | 19.41 |
| South Dakota   | NH Asian    | 0.00 | 0.02 | 188.29 | 57.16 |
| South Dakota   | NH 2+ races | 0.00 | 0.02 | 223.12 | 33.89 |

|              |             |      |      |        |        |
|--------------|-------------|------|------|--------|--------|
| South Dakota | NH Native   | 0.05 | 0.08 | 203.48 | 21.30  |
| South Dakota | NH NHPI     | 0.00 | 0.00 | 0.00   | NA     |
| Tennessee    | All races   | 1.00 | 1.00 | 43.00  | 6.51   |
| Tennessee    | NH White    | 0.84 | 0.72 | 37.51  | 4.73   |
| Tennessee    | Hispanic    | 0.01 | 0.06 | 130.53 | 14.27  |
| Tennessee    | NH Black    | 0.13 | 0.18 | 75.40  | 11.09  |
| Tennessee    | NH Asian    | 0.01 | 0.02 | 29.43  | 5.42   |
| Tennessee    | NH 2+ races | 0.01 | 0.02 | 15.99  | 1.96   |
| Tennessee    | NH Native   | 0.00 | 0.00 | 118.65 | 26.92  |
| Tennessee    | NH NHPI     | 0.00 | 0.00 | 0.00   | 381.18 |
| Texas        | All races   | 1.00 | 1.00 | 58.35  | 9.73   |
| Texas        | NH White    | 0.60 | 0.40 | 31.23  | 4.79   |
| Texas        | Hispanic    | 0.25 | 0.42 | 129.46 | 15.79  |
| Texas        | NH Black    | 0.10 | 0.12 | 63.09  | 8.62   |
| Texas        | NH Asian    | 0.04 | 0.04 | 26.83  | 3.46   |
| Texas        | NH 2+ races | 0.01 | 0.02 | 5.94   | 0.75   |
| Texas        | NH Native   | 0.00 | 0.00 | 30.63  | 12.43  |
| Texas        | NH NHPI     | 0.00 | 0.00 | 88.77  | 36.85  |
| Utah         | All races   | 1.00 | 1.00 | 25.38  | 4.01   |
| Utah         | NH White    | 0.89 | 0.75 | 17.85  | 2.35   |
| Utah         | Hispanic    | 0.07 | 0.15 | 77.22  | 8.36   |
| Utah         | NH Black    | 0.00 | 0.01 | 89.15  | 2.39   |
| Utah         | NH Asian    | 0.02 | 0.04 | 55.58  | 4.22   |
| Utah         | NH 2+ races | 0.01 | 0.03 | 79.53  | 4.61   |
| Utah         | NH          | 0.01 | 0.01 | 202.46 | 28.45  |

|            |             |      |      |        |       |
|------------|-------------|------|------|--------|-------|
|            | Native      |      |      |        |       |
| Utah       | NH NHPI     | 0.00 | 0.00 | 196.52 | 27.78 |
| Vermont    | All races   | 1.00 | 1.00 | 3.07   | 1.19  |
| Vermont    | NH White    | 0.96 | 0.91 | 3.20   | 1.03  |
| Vermont    | Hispanic    | 0.00 | 0.04 | 0.00   | 0.00  |
| Vermont    | NH Black    | 0.01 | 0.01 | 0.00   | 0.00  |
| Vermont    | NH Asian    | 0.02 | 0.02 | 0.00   | 0.00  |
| Vermont    | NH 2+ races | 0.01 | 0.02 | 0.00   | 0.00  |
| Vermont    | NH Native   | 0.00 | 0.00 | 0.00   | 0.00  |
| Vermont    | NH NHPI     | 0.00 | 0.00 | 0.00   | NA    |
| Virginia   | All races   | 1.00 | 1.00 | 22.90  | 3.47  |
| Virginia   | NH White    | 0.73 | 0.59 | 17.01  | 1.99  |
| Virginia   | Hispanic    | 0.03 | 0.11 | 58.31  | 7.54  |
| Virginia   | NH Black    | 0.17 | 0.20 | 42.70  | 6.25  |
| Virginia   | NH Asian    | 0.05 | 0.06 | 16.53  | 2.81  |
| Virginia   | NH 2+ races | 0.01 | 0.03 | 16.34  | 0.38  |
| Virginia   | NH Native   | 0.00 | 0.00 | 41.86  | 20.31 |
| Virginia   | NH NHPI     | 0.00 | 0.00 | 0.00   | 0.00  |
| Washington | All races   | 1.00 | 1.00 | 14.99  | 2.72  |
| Washington | NH White    | 0.84 | 0.66 | 11.67  | 1.48  |
| Washington | Hispanic    | 0.04 | 0.14 | 62.46  | 5.19  |
| Washington | NH Black    | 0.03 | 0.05 | 28.11  | 4.94  |
| Washington | NH Asian    | 0.07 | 0.09 | 16.61  | 2.97  |
| Washington | NH 2+ races | 0.01 | 0.05 | 8.61   | 1.89  |
| Washington | NH Native   | 0.01 | 0.01 | 55.94  | 13.99 |
| Washington | NH NHPI     | 0.00 | 0.01 | 72.94  | 22.64 |



|               |             |      |      |         |       |
|---------------|-------------|------|------|---------|-------|
| West Virginia | All races   | 1.00 | 1.00 | 20.16   | 2.56  |
| West Virginia | NH White    | 0.96 | 0.92 | 19.33   | 2.33  |
| West Virginia | Hispanic    | 0.00 | 0.01 | 144.36  | 0.00  |
| West Virginia | NH Black    | 0.03 | 0.04 | 48.03   | 5.65  |
| West Virginia | NH Asian    | 0.01 | 0.01 | 0.00    | 3.29  |
| West Virginia | NH 2+ races | 0.01 | 0.01 | 0.00    | 0.00  |
| West Virginia | NH Native   | 0.00 | 0.00 | 0.00    | 85.06 |
| West Virginia | NH NHPI     | 0.00 | 0.00 | NA      | NA    |
| Wisconsin     | All races   | 1.00 | 1.00 | 31.37   | 4.47  |
| Wisconsin     | NH White    | 0.92 | 0.80 | 26.35   | 3.22  |
| Wisconsin     | Hispanic    | 0.02 | 0.08 | 123.32  | 11.23 |
| Wisconsin     | NH Black    | 0.03 | 0.06 | 83.00   | 8.63  |
| Wisconsin     | NH Asian    | 0.01 | 0.03 | 61.85   | 7.65  |
| Wisconsin     | NH 2+ races | 0.01 | 0.02 | 23.54   | 0.00  |
| Wisconsin     | NH Native   | 0.01 | 0.01 | 110.99  | 20.34 |
| Wisconsin     | NH NHPI     | 0.00 | 0.00 | 1077.56 | 57.82 |
| Wyoming       | All races   | 1.00 | 1.00 | 20.61   | 5.39  |
| Wyoming       | NH White    | 0.92 | 0.81 | 16.04   | 2.58  |
| Wyoming       | Hispanic    | 0.04 | 0.13 | 35.59   | 5.81  |
| Wyoming       | NH Black    | 0.01 | 0.01 | 0.00    | 0.00  |
| Wyoming       | NH Asian    | 0.00 | 0.00 | 1123.29 | 93.15 |
| Wyoming       | NH 2+ races | 0.01 | 0.03 | 0.00    | 2.82  |

|         |           |      |      |        |       |
|---------|-----------|------|------|--------|-------|
| Wyoming | NH Native | 0.03 | 0.02 | 120.96 | 77.40 |
| Wyoming | NH NHPI   | 0.00 | 0.00 | 0.00   | NA    |

*Supplementary Table 4: Number of lives saved by vaccinating 1,000 individuals, either allocating doses to 65-74 year olds (policy S), or to front line workers (policy F). The ratio  $\frac{LS_j}{LF_j}$  shows the relative number of lives saved comparing the two policies. Results shown for each US state per race/ethnicity categories.*

*"NH" stands for "Non-Hispanic", "2+ races" stands for "Two or more races", "Native" stands for "American Indian or Alaska Native", "NHPI" stands for "Native Hawaiian or Other Pacific Islander"*

| <b>State</b> | <b>Race/ethnicity</b> | $LS_j$ | $LF_j$ | <b>Ratio</b> |
|--------------|-----------------------|--------|--------|--------------|
| Alabama      | All races             | 0.505  | 0.086  | 5.9          |
| Alabama      | NH White              | 0.316  | 0.035  | 9.0          |
| Alabama      | Hispanic              | 0.007  | 0.005  | 1.4          |
| Alabama      | NH Black              | 0.178  | 0.042  | 4.2          |
| Alabama      | NH Asian              | 0.002  | 0.002  | NA           |
| Alabama      | NH 2+ races           | 0.000  | 0.001  | NA           |
| Alabama      | NH AIAN               | 0.002  | 0.001  | NA           |
| Alabama      | NH NHPI               | 0.000  | 0.000  | NA           |
| Alaska       | All races             | 0.130  | 0.043  | 3.0          |
| Alaska       | NH White              | 0.029  | 0.005  | NA           |
| Alaska       | Hispanic              | 0.000  | 0.001  | NA           |
| Alaska       | NH Black              | 0.013  | 0.002  | NA           |
| Alaska       | NH Asian              | 0.013  | 0.008  | NA           |
| Alaska       | NH 2+ races           | 0.013  | 0.003  | NA           |
| Alaska       | NH AIAN               | 0.048  | 0.009  | 5.4          |
| Alaska       | NH NHPI               | 0.013  | 0.010  | NA           |
| Arizona      | All races             | 0.430  | 0.103  | 4.2          |
| Arizona      | NH White              | 0.190  | 0.022  | 8.6          |
| Arizona      | Hispanic              | 0.161  | 0.045  | 3.6          |
| Arizona      | NH Black              | 0.015  | 0.005  | 2.9          |
| Arizona      | NH Asian              | 0.007  | 0.002  | 3.3          |
| Arizona      | NH 2+ races           | 0.004  | 0.001  | 4.0          |
| Arizona      | NH AIAN               | 0.051  | 0.024  | 2.1          |

| <b>State</b> | <b>Race/ethnicity</b> | $LS_j$ | $LF_j$ | <b>Ratio</b> |
|--------------|-----------------------|--------|--------|--------------|
| Arizona      | NH NHPI               | 0.001  | 0.000  | NA           |
| Arkansas     | All races             | 0.393  | 0.067  | 5.9          |
| Arkansas     | NH White              | 0.284  | 0.035  | 8.2          |
| Arkansas     | Hispanic              | 0.019  | 0.008  | 2.2          |
| Arkansas     | NH Black              | 0.071  | 0.014  | 5.0          |
| Arkansas     | NH Asian              | 0.006  | 0.002  | NA           |
| Arkansas     | NH 2+ races           | 0.003  | 0.001  | NA           |
| Arkansas     | NH AIAN               | 0.003  | 0.001  | NA           |
| Arkansas     | NH NHPI               | NA     | NA     | NA           |
| California   | All races             | 0.282  | 0.056  | 5.1          |
| California   | NH White              | 0.073  | 0.008  | 9.4          |
| California   | Hispanic              | 0.154  | 0.039  | 4.0          |
| California   | NH Black              | 0.021  | 0.004  | 5.8          |
| California   | NH Asian              | 0.028  | 0.004  | 6.9          |
| California   | NH 2+ races           | 0.002  | 0.000  | 5.4          |
| California   | NH AIAN               | 0.002  | 0.000  | 7.2          |
| California   | NH NHPI               | 0.002  | 0.001  | 2.6          |
| Colorado     | All races             | 0.236  | 0.038  | 6.3          |
| Colorado     | NH White              | 0.134  | 0.012  | 10.8         |
| Colorado     | Hispanic              | 0.070  | 0.019  | 3.8          |
| Colorado     | NH Black              | 0.015  | 0.003  | 4.4          |
| Colorado     | NH Asian              | 0.010  | 0.002  | 5.5          |
| Colorado     | NH 2+ races           | 0.001  | 0.001  | NA           |
| Colorado     | NH AIAN               | 0.004  | 0.001  | 2.7          |
| Colorado     | NH NHPI               | 0.001  | 0.000  | NA           |
| Connecticut  | All races             | 0.368  | 0.051  | 7.2          |
| Connecticut  | NH White              | 0.234  | 0.021  | 10.9         |
| Connecticut  | Hispanic              | 0.052  | 0.015  | 3.3          |
| Connecticut  | NH Black              | 0.074  | 0.013  | 5.6          |
| Connecticut  | NH Asian              | 0.005  | 0.002  | 2.7          |
| Connecticut  | NH 2+ races           | 0.000  | 0.000  | NA           |
| Connecticut  | NH AIAN               | 0.002  | 0.000  | NA           |
| Connecticut  | NH NHPI               | 0.000  | NA     | NA           |
| Delaware     | All races             | 0.205  | 0.070  | 2.9          |

| <b>State</b>         | <b>Race/ethnicity</b> | $LS_j$ | $LF_j$ | <b>Ratio</b> |
|----------------------|-----------------------|--------|--------|--------------|
| Delaware             | NH White              | 0.133  | 0.029  | 4.7          |
| Delaware             | Hispanic              | 0.015  | 0.012  | NA           |
| Delaware             | NH Black              | 0.056  | 0.020  | 2.9          |
| Delaware             | NH Asian              | 0.000  | 0.004  | NA           |
| Delaware             | NH 2+ races           | 0.000  | 0.001  | NA           |
| Delaware             | NH AIAN               | 0.000  | 0.004  | NA           |
| Delaware             | NH NHPI               | NA     | NA     | NA           |
| District of Columbia | All races             | 0.898  | 0.144  | 6.3          |
| District of Columbia | NH White              | 0.073  | 0.005  | 15.8         |
| District of Columbia | Hispanic              | 0.124  | 0.050  | 2.5          |
| District of Columbia | NH Black              | 0.665  | 0.113  | 5.9          |
| District of Columbia | NH Asian              | 0.018  | 0.003  | NA           |
| District of Columbia | NH 2+ races           | 0.018  | 0.000  | NA           |
| District of Columbia | NH AIAN               | 0.000  | 0.003  | NA           |
| District of Columbia | NH NHPI               | NA     | NA     | NA           |
| Florida              | All races             | 0.334  | 0.063  | 5.3          |
| Florida              | NH White              | 0.161  | 0.018  | 8.7          |
| Florida              | Hispanic              | 0.089  | 0.022  | 4.1          |
| Florida              | NH Black              | 0.078  | 0.023  | 3.4          |
| Florida              | NH Asian              | 0.005  | 0.001  | 3.8          |
| Florida              | NH 2+ races           | 0.001  | 0.000  | NA           |
| Florida              | NH AIAN               | 0.000  | 0.000  | NA           |
| Florida              | NH NHPI               | 0.000  | 0.000  | NA           |
| Georgia              | All races             | 0.425  | 0.067  | 6.3          |
| Georgia              | NH White              | 0.211  | 0.022  | 9.7          |
| Georgia              | Hispanic              | 0.026  | 0.009  | 2.9          |
| Georgia              | NH Black              | 0.178  | 0.034  | 5.2          |
| Georgia              | NH Asian              | 0.009  | 0.001  | 6.5          |
| Georgia              | NH 2+ races           | 0.001  | 0.000  | NA           |
| Georgia              | NH AIAN               | 0.000  | 0.000  | NA           |
| Georgia              | NH NHPI               | 0.001  | 0.000  | NA           |
| Hawaii               | All races             | 0.094  | 0.035  | 2.7          |
| Hawaii               | NH White              | 0.006  | 0.003  | NA           |
| Hawaii               | Hispanic              | 0.006  | 0.006  | NA           |

| <b>State</b> | <b>Race/ethnicity</b> | $LS_j$ | $LF_j$ | <b>Ratio</b> |
|--------------|-----------------------|--------|--------|--------------|
| Hawaii       | NH Black              | 0.006  | 0.001  | NA           |
| Hawaii       | NH Asian              | 0.040  | 0.012  | 3.4          |
| Hawaii       | NH 2+ races           | 0.006  | 0.004  | NA           |
| Hawaii       | NH AIAN               | 0.000  | 0.000  | NA           |
| Hawaii       | NH NHPI               | 0.030  | 0.011  | 2.8          |
| Idaho        | All races             | 0.264  | 0.041  | 6.4          |
| Idaho        | NH White              | 0.206  | 0.023  | 9.0          |
| Idaho        | Hispanic              | 0.040  | 0.011  | 3.8          |
| Idaho        | NH Black              | 0.005  | 0.001  | NA           |
| Idaho        | NH Asian              | 0.005  | 0.003  | NA           |
| Idaho        | NH 2+ races           | 0.005  | 0.001  | NA           |
| Idaho        | NH AIAN               | 0.005  | 0.005  | NA           |
| Idaho        | NH NHPI               | NA     | 0.000  | NA           |
| Illinois     | All races             | 0.432  | 0.071  | 6.1          |
| Illinois     | NH White              | 0.221  | 0.019  | 11.4         |
| Illinois     | Hispanic              | 0.086  | 0.031  | 2.8          |
| Illinois     | NH Black              | 0.106  | 0.016  | 6.4          |
| Illinois     | NH Asian              | 0.018  | 0.003  | 6.3          |
| Illinois     | NH 2+ races           | 0.001  | 0.001  | NA           |
| Illinois     | NH AIAN               | 0.001  | 0.000  | NA           |
| Illinois     | NH NHPI               | NA     | 0.000  | NA           |
| Indiana      | All races             | 0.385  | 0.049  | 7.8          |
| Indiana      | NH White              | 0.304  | 0.031  | 9.9          |
| Indiana      | Hispanic              | 0.020  | 0.006  | 3.6          |
| Indiana      | NH Black              | 0.054  | 0.010  | 5.3          |
| Indiana      | NH Asian              | 0.003  | 0.001  | NA           |
| Indiana      | NH 2+ races           | 0.001  | 0.001  | NA           |
| Indiana      | NH AIAN               | 0.001  | 0.001  | NA           |
| Indiana      | NH NHPI               | 0.001  | NA     | NA           |
| Iowa         | All races             | 0.341  | 0.060  | 5.7          |
| Iowa         | NH White              | 0.300  | 0.040  | 7.4          |
| Iowa         | Hispanic              | 0.013  | 0.006  | 2.2          |
| Iowa         | NH Black              | 0.014  | 0.008  | 1.7          |
| Iowa         | NH Asian              | 0.007  | 0.001  | 6.6          |

| <b>State</b> | <b>Race/ethnicity</b> | $LS_j$ | $LF_j$ | <b>Ratio</b> |
|--------------|-----------------------|--------|--------|--------------|
| Iowa         | NH 2+ races           | 0.002  | 0.001  | NA           |
| Iowa         | NH AIAN               | 0.002  | 0.002  | NA           |
| Iowa         | NH NHPI               | 0.002  | 0.000  | NA           |
| Kansas       | All races             | 0.308  | 0.054  | 5.7          |
| Kansas       | NH White              | 0.229  | 0.027  | 8.5          |
| Kansas       | Hispanic              | 0.037  | 0.013  | 2.9          |
| Kansas       | NH Black              | 0.024  | 0.007  | 3.5          |
| Kansas       | NH Asian              | 0.006  | 0.002  | NA           |
| Kansas       | NH 2+ races           | 0.003  | 0.001  | NA           |
| Kansas       | NH AIAN               | 0.007  | 0.004  | NA           |
| Kansas       | NH NHPI               | NA     | NA     | NA           |
| Kentucky     | All races             | 0.287  | 0.037  | 7.8          |
| Kentucky     | NH White              | 0.238  | 0.025  | 9.4          |
| Kentucky     | Hispanic              | 0.005  | 0.005  | 1.0          |
| Kentucky     | NH Black              | 0.040  | 0.005  | 7.8          |
| Kentucky     | NH Asian              | 0.002  | 0.001  | NA           |
| Kentucky     | NH 2+ races           | 0.000  | 0.000  | NA           |
| Kentucky     | NH AIAN               | 0.002  | 0.000  | NA           |
| Kentucky     | NH NHPI               | 0.000  | 0.000  | NA           |
| Louisiana    | All races             | 0.595  | 0.099  | 6.0          |
| Louisiana    | NH White              | 0.283  | 0.028  | 10.1         |
| Louisiana    | Hispanic              | 0.016  | 0.007  | 2.4          |
| Louisiana    | NH Black              | 0.290  | 0.065  | 4.5          |
| Louisiana    | NH Asian              | 0.002  | 0.002  | NA           |
| Louisiana    | NH 2+ races           | 0.002  | 0.000  | NA           |
| Louisiana    | NH AIAN               | 0.002  | 0.001  | NA           |
| Louisiana    | NH NHPI               | NA     | NA     | NA           |
| Maine        | All races             | 0.061  | 0.012  | 5.2          |
| Maine        | NH White              | 0.049  | 0.008  | 6.5          |
| Maine        | Hispanic              | 0.004  | 0.000  | NA           |
| Maine        | NH Black              | 0.004  | 0.003  | NA           |
| Maine        | NH Asian              | 0.000  | 0.000  | NA           |
| Maine        | NH 2+ races           | 0.004  | 0.000  | NA           |
| Maine        | NH AIAN               | 0.000  | 0.000  | NA           |

| <b>State</b>  | <b>Race/ethnicity</b> | $LS_j$ | $LF_j$ | <b>Ratio</b> |
|---------------|-----------------------|--------|--------|--------------|
| Maine         | NH NHPI               | NA     | NA     | NA           |
| Maryland      | All races             | 0.355  | 0.063  | 5.7          |
| Maryland      | NH White              | 0.137  | 0.013  | 10.7         |
| Maryland      | Hispanic              | 0.035  | 0.020  | 1.8          |
| Maryland      | NH Black              | 0.165  | 0.027  | 6.2          |
| Maryland      | NH Asian              | 0.015  | 0.003  | 4.5          |
| Maryland      | NH 2+ races           | 0.001  | 0.000  | NA           |
| Maryland      | NH AIAN               | 0.001  | 0.000  | NA           |
| Maryland      | NH NHPI               | NA     | 0.000  | NA           |
| Massachusetts | All races             | 0.328  | 0.044  | 7.4          |
| Massachusetts | NH White              | 0.241  | 0.023  | 10.4         |
| Massachusetts | Hispanic              | 0.034  | 0.010  | 3.3          |
| Massachusetts | NH Black              | 0.036  | 0.008  | 4.6          |
| Massachusetts | NH Asian              | 0.014  | 0.002  | 6.6          |
| Massachusetts | NH 2+ races           | 0.001  | 0.001  | NA           |
| Massachusetts | NH AIAN               | 0.001  | 0.000  | NA           |
| Massachusetts | NH NHPI               | 0.000  | 0.000  | NA           |
| Michigan      | All races             | 0.417  | 0.061  | 6.9          |
| Michigan      | NH White              | 0.251  | 0.027  | 9.1          |
| Michigan      | Hispanic              | 0.015  | 0.004  | 3.4          |
| Michigan      | NH Black              | 0.141  | 0.028  | 5.0          |
| Michigan      | NH Asian              | 0.006  | 0.001  | 10.6         |
| Michigan      | NH 2+ races           | 0.001  | 0.000  | NA           |
| Michigan      | NH AIAN               | 0.003  | 0.001  | 4.5          |
| Michigan      | NH NHPI               | NA     | NA     | NA           |
| Minnesota     | All races             | 0.228  | 0.033  | 7.0          |
| Minnesota     | NH White              | 0.180  | 0.016  | 11.5         |
| Minnesota     | Hispanic              | 0.007  | 0.004  | 1.6          |
| Minnesota     | NH Black              | 0.022  | 0.006  | 3.5          |
| Minnesota     | NH Asian              | 0.014  | 0.004  | 3.9          |
| Minnesota     | NH 2+ races           | 0.001  | 0.001  | NA           |
| Minnesota     | NH AIAN               | 0.004  | 0.002  | 1.8          |
| Minnesota     | NH NHPI               | NA     | NA     | NA           |
| Mississippi   | All races             | 0.688  | 0.129  | 5.3          |

| <b>State</b> | <b>Race/ethnicity</b> | $LS_j$ | $LF_j$ | <b>Ratio</b> |
|--------------|-----------------------|--------|--------|--------------|
| Mississippi  | NH White              | 0.330  | 0.038  | 8.8          |
| Mississippi  | Hispanic              | 0.003  | 0.005  | NA           |
| Mississippi  | NH Black              | 0.333  | 0.079  | 4.2          |
| Mississippi  | NH Asian              | 0.007  | 0.002  | 4.2          |
| Mississippi  | NH 2+ races           | 0.003  | 0.001  | NA           |
| Mississippi  | NH AIAN               | 0.011  | 0.008  | 1.4          |
| Mississippi  | NH NHPI               | NA     | NA     | NA           |
| Missouri     | All races             | 0.364  | 0.048  | 7.5          |
| Missouri     | NH White              | 0.283  | 0.030  | 9.4          |
| Missouri     | Hispanic              | 0.010  | 0.005  | 2.0          |
| Missouri     | NH Black              | 0.062  | 0.011  | 5.4          |
| Missouri     | NH Asian              | 0.006  | 0.001  | 6.8          |
| Missouri     | NH 2+ races           | 0.001  | 0.000  | NA           |
| Missouri     | NH AIAN               | 0.001  | 0.000  | NA           |
| Missouri     | NH NHPI               | 0.001  | 0.000  | NA           |
| Montana      | All races             | 0.311  | 0.072  | 4.3          |
| Montana      | NH White              | 0.193  | 0.028  | 6.8          |
| Montana      | Hispanic              | 0.014  | 0.005  | NA           |
| Montana      | NH Black              | 0.006  | 0.000  | NA           |
| Montana      | NH Asian              | 0.006  | 0.001  | NA           |
| Montana      | NH 2+ races           | 0.006  | 0.002  | NA           |
| Montana      | NH AIAN               | 0.085  | 0.029  | 2.9          |
| Montana      | NH NHPI               | NA     | NA     | NA           |
| Nebraska     | All races             | 0.333  | 0.065  | 5.1          |
| Nebraska     | NH White              | 0.267  | 0.035  | 7.6          |
| Nebraska     | Hispanic              | 0.036  | 0.015  | 2.4          |
| Nebraska     | NH Black              | 0.017  | 0.008  | 2.1          |
| Nebraska     | NH Asian              | 0.004  | 0.003  | NA           |
| Nebraska     | NH 2+ races           | 0.004  | 0.001  | NA           |
| Nebraska     | NH AIAN               | 0.004  | 0.003  | NA           |
| Nebraska     | NH NHPI               | NA     | NA     | NA           |
| Nevada       | All races             | 0.444  | 0.097  | 4.6          |
| Nevada       | NH White              | 0.205  | 0.021  | 10.0         |
| Nevada       | Hispanic              | 0.113  | 0.052  | 2.2          |



| <b>State</b>  | <b>Race/ethnicity</b> | $LS_j$ | $LF_j$ | <b>Ratio</b> |
|---------------|-----------------------|--------|--------|--------------|
| Nevada        | NH Black              | 0.048  | 0.013  | 3.8          |
| Nevada        | NH Asian              | 0.064  | 0.009  | 7.0          |
| Nevada        | NH 2+ races           | 0.003  | 0.002  | NA           |
| Nevada        | NH AIAN               | 0.008  | 0.002  | 4.9          |
| Nevada        | NH NHPI               | 0.003  | 0.005  | NA           |
| New Hampshire | All races             | 0.096  | 0.018  | 5.4          |
| New Hampshire | NH White              | 0.084  | 0.013  | 6.6          |
| New Hampshire | Hispanic              | 0.004  | 0.001  | NA           |
| New Hampshire | NH Black              | 0.004  | 0.002  | NA           |
| New Hampshire | NH Asian              | 0.004  | 0.002  | NA           |
| New Hampshire | NH 2+ races           | 0.000  | 0.000  | NA           |
| New Hampshire | NH AIAN               | 0.000  | 0.000  | NA           |
| New Hampshire | NH NHPI               | NA     | NA     | NA           |
| New Jersey    | All races             | 0.691  | 0.143  | 4.8          |
| New Jersey    | NH White              | 0.326  | 0.042  | 7.7          |
| New Jersey    | Hispanic              | 0.163  | 0.053  | 3.1          |
| New Jersey    | NH Black              | 0.146  | 0.033  | 4.4          |
| New Jersey    | NH Asian              | 0.051  | 0.009  | 5.8          |
| New Jersey    | NH 2+ races           | 0.003  | 0.001  | 3.3          |
| New Jersey    | NH AIAN               | 0.001  | 0.000  | NA           |
| New Jersey    | NH NHPI               | 0.001  | NA     | NA           |
| New Mexico    | All races             | 0.357  | 0.105  | 3.4          |
| New Mexico    | NH White              | 0.076  | 0.009  | 8.1          |
| New Mexico    | Hispanic              | 0.140  | 0.039  | 3.6          |
| New Mexico    | NH Black              | 0.004  | 0.003  | NA           |
| New Mexico    | NH Asian              | 0.004  | 0.000  | NA           |
| New Mexico    | NH 2+ races           | 0.004  | 0.004  | NA           |
| New Mexico    | NH AIAN               | 0.129  | 0.054  | 2.4          |
| New Mexico    | NH NHPI               | 0.000  | NA     | NA           |
| New York      | All races             | 0.759  | 0.145  | 5.2          |
| New York      | NH White              | 0.285  | 0.032  | 9.1          |
| New York      | Hispanic              | 0.200  | 0.061  | 3.3          |
| New York      | NH Black              | 0.203  | 0.033  | 6.1          |
| New York      | NH Asian              | 0.068  | 0.019  | 3.6          |

| <b>State</b>   | <b>Race/ethnicity</b> | $LS_j$ | $LF_j$ | <b>Ratio</b> |
|----------------|-----------------------|--------|--------|--------------|
| New York       | NH 2+ races           | 0.001  | 0.001  | 2.6          |
| New York       | NH AIAN               | 0.001  | 0.001  | 2.2          |
| New York       | NH NHPI               | 0.000  | 0.001  | NA           |
| North Carolina | All races             | 0.129  | 0.022  | 5.8          |
| North Carolina | NH White              | 0.064  | 0.007  | 8.8          |
| North Carolina | Hispanic              | 0.012  | 0.005  | 2.3          |
| North Carolina | NH Black              | 0.048  | 0.008  | 6.0          |
| North Carolina | NH Asian              | 0.002  | 0.000  | 5.3          |
| North Carolina | NH 2+ races           | 0.000  | 0.000  | NA           |
| North Carolina | NH AIAN               | 0.002  | 0.000  | NA           |
| North Carolina | NH NHPI               | 0.000  | 0.000  | NA           |
| North Dakota   | All races             | 0.536  | 0.101  | 5.3          |
| North Dakota   | NH White              | 0.427  | 0.059  | 7.3          |
| North Dakota   | Hispanic              | 0.012  | 0.009  | NA           |
| North Dakota   | NH Black              | 0.012  | 0.000  | NA           |
| North Dakota   | NH Asian              | 0.012  | 0.000  | NA           |
| North Dakota   | NH 2+ races           | 0.000  | 0.001  | NA           |
| North Dakota   | NH AIAN               | 0.074  | 0.019  | 3.9          |
| North Dakota   | NH NHPI               | 0.000  | NA     | NA           |
| Ohio           | All races             | 0.279  | 0.034  | 8.1          |
| Ohio           | NH White              | 0.221  | 0.024  | 9.3          |
| Ohio           | Hispanic              | 0.005  | 0.002  | 2.6          |
| Ohio           | NH Black              | 0.049  | 0.006  | 7.5          |
| Ohio           | NH Asian              | 0.003  | 0.001  | 4.7          |
| Ohio           | NH 2+ races           | 0.001  | 0.001  | NA           |
| Ohio           | NH AIAN               | 0.001  | 0.001  | NA           |
| Ohio           | NH NHPI               | 0.000  | 0.000  | NA           |
| Oklahoma       | All races             | 0.384  | 0.052  | 7.4          |
| Oklahoma       | NH White              | 0.256  | 0.025  | 10.2         |
| Oklahoma       | Hispanic              | 0.028  | 0.010  | 2.9          |
| Oklahoma       | NH Black              | 0.029  | 0.005  | 5.9          |
| Oklahoma       | NH Asian              | 0.006  | 0.001  | 4.4          |
| Oklahoma       | NH 2+ races           | 0.011  | 0.001  | NA           |
| Oklahoma       | NH AIAN               | 0.052  | 0.010  | 5.1          |

| <b>State</b>   | <b>Race/ethnicity</b> | $LS_j$ | $LF_j$ | <b>Ratio</b> |
|----------------|-----------------------|--------|--------|--------------|
| Oklahoma       | NH NHPI               | 0.002  | 0.003  | NA           |
| Oregon         | All races             | 0.073  | 0.020  | 3.7          |
| Oregon         | NH White              | 0.052  | 0.008  | 6.8          |
| Oregon         | Hispanic              | 0.012  | 0.007  | 1.8          |
| Oregon         | NH Black              | 0.002  | 0.001  | NA           |
| Oregon         | NH Asian              | 0.004  | 0.001  | 3.1          |
| Oregon         | NH 2+ races           | 0.000  | 0.001  | NA           |
| Oregon         | NH AIAN               | 0.002  | 0.001  | NA           |
| Oregon         | NH NHPI               | 0.002  | 0.001  | NA           |
| Pennsylvania   | All races             | 0.323  | 0.046  | 7.0          |
| Pennsylvania   | NH White              | 0.222  | 0.025  | 9.1          |
| Pennsylvania   | Hispanic              | 0.021  | 0.005  | 3.9          |
| Pennsylvania   | NH Black              | 0.069  | 0.014  | 5.1          |
| Pennsylvania   | NH Asian              | 0.009  | 0.002  | 5.0          |
| Pennsylvania   | NH 2+ races           | 0.001  | 0.000  | NA           |
| Pennsylvania   | NH AIAN               | 0.001  | 0.000  | NA           |
| Pennsylvania   | NH NHPI               | 0.000  | NA     | NA           |
| Rhode Island   | All races             | 0.368  | 0.050  | 7.4          |
| Rhode Island   | NH White              | 0.269  | 0.025  | 10.9         |
| Rhode Island   | Hispanic              | 0.050  | 0.004  | 12.2         |
| Rhode Island   | NH Black              | 0.029  | 0.004  | 6.7          |
| Rhode Island   | NH Asian              | 0.007  | 0.005  | NA           |
| Rhode Island   | NH 2+ races           | 0.007  | 0.001  | NA           |
| Rhode Island   | NH AIAN               | 0.007  | NA     | NA           |
| Rhode Island   | NH NHPI               | NA     | NA     | NA           |
| South Carolina | All races             | 0.352  | 0.058  | 6.1          |
| South Carolina | NH White              | 0.189  | 0.022  | 8.7          |
| South Carolina | Hispanic              | 0.008  | 0.005  | 1.6          |
| South Carolina | NH Black              | 0.151  | 0.027  | 5.5          |
| South Carolina | NH Asian              | 0.002  | 0.001  | NA           |
| South Carolina | NH 2+ races           | 0.002  | 0.000  | NA           |
| South Carolina | NH AIAN               | 0.002  | 0.000  | NA           |
| South Carolina | NH NHPI               | 0.000  | 0.000  | NA           |
| South Dakota   | All races             | 0.500  | 0.097  | 5.2          |

| <b>State</b> | <b>Race/ethnicity</b> | $LS_j$ | $LF_j$ | <b>Ratio</b> |
|--------------|-----------------------|--------|--------|--------------|
| South Dakota | NH White              | 0.368  | 0.044  | 8.4          |
| South Dakota | Hispanic              | 0.009  | 0.014  | NA           |
| South Dakota | NH Black              | 0.009  | 0.005  | NA           |
| South Dakota | NH Asian              | 0.009  | 0.013  | NA           |
| South Dakota | NH 2+ races           | 0.009  | 0.006  | NA           |
| South Dakota | NH AIAN               | 0.097  | 0.015  | 6.3          |
| South Dakota | NH NHPI               | 0.000  | NA     | NA           |
| Tennessee    | All races             | 0.409  | 0.062  | 6.6          |
| Tennessee    | NH White              | 0.300  | 0.032  | 9.3          |
| Tennessee    | Hispanic              | 0.013  | 0.008  | 1.6          |
| Tennessee    | NH Black              | 0.090  | 0.019  | 4.7          |
| Tennessee    | NH Asian              | 0.003  | 0.001  | 3.4          |
| Tennessee    | NH 2+ races           | 0.001  | 0.000  | NA           |
| Tennessee    | NH AIAN               | 0.001  | 0.001  | NA           |
| Tennessee    | NH NHPI               | 0.000  | 0.003  | NA           |
| Texas        | All races             | 0.554  | 0.092  | 6.0          |
| Texas        | NH White              | 0.177  | 0.018  | 9.8          |
| Texas        | Hispanic              | 0.302  | 0.063  | 4.8          |
| Texas        | NH Black              | 0.062  | 0.010  | 6.2          |
| Texas        | NH Asian              | 0.011  | 0.001  | 8.4          |
| Texas        | NH 2+ races           | 0.000  | 0.000  | NA           |
| Texas        | NH AIAN               | 0.001  | 0.000  | 2.0          |
| Texas        | NH NHPI               | 0.000  | 0.000  | NA           |
| Utah         | All races             | 0.241  | 0.038  | 6.3          |
| Utah         | NH White              | 0.152  | 0.017  | 9.0          |
| Utah         | Hispanic              | 0.050  | 0.012  | 4.1          |
| Utah         | NH Black              | 0.004  | 0.000  | NA           |
| Utah         | NH Asian              | 0.008  | 0.002  | NA           |
| Utah         | NH 2+ races           | 0.004  | 0.001  | NA           |
| Utah         | NH AIAN               | 0.015  | 0.003  | 5.2          |
| Utah         | NH NHPI               | 0.008  | 0.001  | NA           |
| Vermont      | All races             | 0.029  | 0.011  | 2.6          |
| Vermont      | NH White              | 0.029  | 0.009  | 3.3          |
| Vermont      | Hispanic              | 0.000  | 0.000  | NA           |

| <b>State</b>  | <b>Race/ethnicity</b> | $LS_j$ | $LF_j$ | <b>Ratio</b> |
|---------------|-----------------------|--------|--------|--------------|
| Vermont       | NH Black              | 0.000  | 0.000  | NA           |
| Vermont       | NH Asian              | 0.000  | 0.000  | NA           |
| Vermont       | NH 2+ races           | 0.000  | 0.000  | NA           |
| Vermont       | NH AIAN               | 0.000  | 0.000  | NA           |
| Vermont       | NH NHPI               | 0.000  | NA     | NA           |
| Virginia      | All races             | 0.218  | 0.033  | 6.6          |
| Virginia      | NH White              | 0.118  | 0.011  | 10.5         |
| Virginia      | Hispanic              | 0.019  | 0.008  | 2.5          |
| Virginia      | NH Black              | 0.070  | 0.012  | 5.7          |
| Virginia      | NH Asian              | 0.008  | 0.002  | 5.1          |
| Virginia      | NH 2+ races           | 0.001  | 0.000  | NA           |
| Virginia      | NH AIAN               | 0.001  | 0.000  | NA           |
| Virginia      | NH NHPI               | 0.000  | 0.000  | NA           |
| Washington    | All races             | 0.142  | 0.026  | 5.5          |
| Washington    | NH White              | 0.093  | 0.009  | 10.0         |
| Washington    | Hispanic              | 0.023  | 0.007  | 3.3          |
| Washington    | NH Black              | 0.007  | 0.002  | 3.1          |
| Washington    | NH Asian              | 0.011  | 0.002  | 4.7          |
| Washington    | NH 2+ races           | 0.001  | 0.001  | NA           |
| Washington    | NH AIAN               | 0.005  | 0.002  | 3.1          |
| Washington    | NH NHPI               | 0.002  | 0.001  | NA           |
| West Virginia | All races             | 0.192  | 0.024  | 7.9          |
| West Virginia | NH White              | 0.176  | 0.020  | 8.6          |
| West Virginia | Hispanic              | 0.004  | 0.000  | NA           |
| West Virginia | NH Black              | 0.012  | 0.002  | NA           |
| West Virginia | NH Asian              | 0.000  | 0.000  | NA           |
| West Virginia | NH 2+ races           | 0.000  | 0.000  | NA           |
| West Virginia | NH AIAN               | 0.000  | 0.002  | NA           |
| West Virginia | NH NHPI               | NA     | NA     | NA           |
| Wisconsin     | All races             | 0.298  | 0.042  | 7.0          |
| Wisconsin     | NH White              | 0.230  | 0.024  | 9.4          |
| Wisconsin     | Hispanic              | 0.025  | 0.009  | 2.8          |
| Wisconsin     | NH Black              | 0.027  | 0.005  | 5.4          |
| Wisconsin     | NH Asian              | 0.007  | 0.002  | 3.1          |

| State     | Race/ethnicity | $LS_j$ | $LF_j$ | Ratio |
|-----------|----------------|--------|--------|-------|
| Wisconsin | NH 2+ races    | 0.001  | 0.000  | NA    |
| Wisconsin | NH AIAN        | 0.006  | 0.002  | 3.6   |
| Wisconsin | NH NHPI        | 0.001  | 0.001  | NA    |
| Wyoming   | All races      | 0.196  | 0.051  | 3.8   |
| Wyoming   | NH White       | 0.140  | 0.020  | 7.1   |
| Wyoming   | Hispanic       | 0.013  | 0.007  | NA    |
| Wyoming   | NH Black       | 0.000  | 0.000  | NA    |
| Wyoming   | NH Asian       | 0.013  | 0.004  | NA    |
| Wyoming   | NH 2+ races    | 0.000  | 0.001  | NA    |
| Wyoming   | NH AIAN        | 0.031  | 0.017  | NA    |
| Wyoming   | NH NHPI        | 0.000  | NA     | NA    |

*Supplementary Table 5: Number of years of life saved by vaccinating 1,000 individuals, either allocating doses to 65-74 year olds (policy S), or to front line workers (policy F). The ratio  $\frac{YS_j}{YF_j}$  shows the relative number of lives saved comparing the two policies. Results shown for each US state per race/ethnicity categories.*

*"NH" stands for "Non-Hispanic", "2+ races" stands for "Two or more races", "Native" stands for "American Indian or Alaska Native", "NHPI" stands for "Native Hawaiian or Other Pacific Islander"*

| State   | Race        | $YS_j$ | $YF_j$ | Ratio |
|---------|-------------|--------|--------|-------|
| Alabama | All races   | 8.804  | 2.718  | 3.2   |
| Alabama | NH White    | 5.513  | 1.068  | 5.2   |
| Alabama | Hispanic    | 0.128  | 0.188  | 0.7   |
| Alabama | NH Black    | 3.102  | 1.390  | 2.2   |
| Alabama | NH Asian    | 0.031  | 0.052  | NA    |
| Alabama | NH 2+ races | 0.000  | 0.019  | NA    |
| Alabama | NH AIAN     | 0.031  | 0.037  | NA    |
| Alabama | NH NHPI     | 0.000  | 0.000  | NA    |
| Alaska  | All races   | 2.257  | 1.532  | 1.5   |
| Alaska  | NH White    | 0.507  | 0.164  | NA    |
| Alaska  | Hispanic    | 0.000  | 0.039  | NA    |
| Alaska  | NH Black    | 0.230  | 0.070  | NA    |

| <b>State</b> | <b>Race</b> | $YS_j$ | $YF_j$ | <b>Ratio</b> |
|--------------|-------------|--------|--------|--------------|
| Alaska       | NH Asian    | 0.230  | 0.260  | NA           |
| Alaska       | NH 2+ races | 0.230  | 0.071  | NA           |
| Alaska       | NH AIAN     | 0.829  | 0.345  | 2.4          |
| Alaska       | NH NHPI     | 0.230  | 0.259  | NA           |
| Arizona      | All races   | 7.499  | 3.342  | 2.2          |
| Arizona      | NH White    | 3.319  | 0.649  | 5.1          |
| Arizona      | Hispanic    | 2.812  | 1.458  | 1.9          |
| Arizona      | NH Black    | 0.264  | 0.169  | 1.6          |
| Arizona      | NH Asian    | 0.126  | 0.068  | 1.8          |
| Arizona      | NH 2+ races | 0.071  | 0.040  | 1.8          |
| Arizona      | NH AIAN     | 0.887  | 0.842  | 1.1          |
| Arizona      | NH NHPI     | 0.021  | 0.012  | NA           |
| Arkansas     | All races   | 6.855  | 2.118  | 3.2          |
| Arkansas     | NH White    | 4.951  | 1.061  | 4.7          |
| Arkansas     | Hispanic    | 0.327  | 0.257  | 1.3          |
| Arkansas     | NH Black    | 1.240  | 0.444  | 2.8          |
| Arkansas     | NH Asian    | 0.096  | 0.059  | NA           |
| Arkansas     | NH 2+ races | 0.048  | 0.043  | NA           |
| Arkansas     | NH AIAN     | 0.048  | 0.013  | NA           |
| Arkansas     | NH NHPI     | NA     | NA     | NA           |
| California   | All races   | 4.915  | 1.784  | 2.8          |
| California   | NH White    | 1.272  | 0.234  | 5.4          |
| California   | Hispanic    | 2.684  | 1.258  | 2.1          |
| California   | NH Black    | 0.373  | 0.118  | 3.2          |
| California   | NH Asian    | 0.488  | 0.124  | 4.0          |
| California   | NH 2+ races | 0.035  | 0.013  | 2.8          |
| California   | NH AIAN     | 0.033  | 0.010  | 3.2          |
| California   | NH NHPI     | 0.031  | 0.022  | 1.4          |
| Colorado     | All races   | 4.108  | 1.209  | 3.4          |
| Colorado     | NH White    | 2.341  | 0.383  | 6.1          |
| Colorado     | Hispanic    | 1.227  | 0.582  | 2.1          |
| Colorado     | NH Black    | 0.257  | 0.122  | 2.1          |
| Colorado     | NH Asian    | 0.168  | 0.055  | 3.1          |
| Colorado     | NH 2+ races | 0.025  | 0.021  | NA           |

| <b>State</b>         | <b>Race</b> | $YS_j$ | $YF_j$ | <b>Ratio</b> |
|----------------------|-------------|--------|--------|--------------|
| Colorado             | NH AIAN     | 0.064  | 0.062  | 1.0          |
| Colorado             | NH NHPI     | 0.025  | 0.006  | NA           |
| Connecticut          | All races   | 6.410  | 1.545  | 4.1          |
| Connecticut          | NH White    | 4.085  | 0.606  | 6.7          |
| Connecticut          | Hispanic    | 0.898  | 0.512  | 1.8          |
| Connecticut          | NH Black    | 1.296  | 0.388  | 3.3          |
| Connecticut          | NH Asian    | 0.094  | 0.064  | 1.5          |
| Connecticut          | NH 2+ races | 0.000  | 0.000  | NA           |
| Connecticut          | NH AIAN     | 0.036  | 0.000  | NA           |
| Connecticut          | NH NHPI     | 0.000  | NA     | NA           |
| Delaware             | All races   | 3.570  | 2.614  | 1.4          |
| Delaware             | NH White    | 2.324  | 1.047  | 2.2          |
| Delaware             | Hispanic    | 0.264  | 0.544  | NA           |
| Delaware             | NH Black    | 0.982  | 0.741  | 1.3          |
| Delaware             | NH Asian    | 0.000  | 0.089  | NA           |
| Delaware             | NH 2+ races | 0.000  | 0.025  | NA           |
| Delaware             | NH AIAN     | 0.000  | 0.113  | NA           |
| Delaware             | NH NHPI     | NA     | NA     | NA           |
| District of Columbia | All races   | 15.651 | 4.507  | 3.5          |
| District of Columbia | NH White    | 1.272  | 0.145  | 8.8          |
| District of Columbia | Hispanic    | 2.163  | 1.769  | 1.2          |
| District of Columbia | NH Black    | 11.579 | 3.461  | 3.3          |
| District of Columbia | NH Asian    | 0.318  | 0.122  | NA           |
| District of Columbia | NH 2+ races | 0.318  | 0.000  | NA           |
| District of Columbia | NH AIAN     | 0.000  | 0.070  | NA           |
| District of Columbia | NH NHPI     | NA     | NA     | NA           |
| Florida              | All races   | 5.822  | 1.975  | 2.9          |
| Florida              | NH White    | 2.800  | 0.540  | 5.2          |
| Florida              | Hispanic    | 1.548  | 0.665  | 2.3          |
| Florida              | NH Black    | 1.352  | 0.723  | 1.9          |
| Florida              | NH Asian    | 0.096  | 0.048  | 2.0          |
| Florida              | NH 2+ races | 0.013  | 0.019  | NA           |
| Florida              | NH AIAN     | 0.007  | 0.019  | NA           |
| Florida              | NH NHPI     | 0.007  | 0.004  | NA           |



| <b>State</b> | <b>Race</b> | $YS_j$ | $YF_j$ | <b>Ratio</b> |
|--------------|-------------|--------|--------|--------------|
| Georgia      | All races   | 7.402  | 2.133  | 3.5          |
| Georgia      | NH White    | 3.670  | 0.639  | 5.7          |
| Georgia      | Hispanic    | 0.447  | 0.299  | 1.5          |
| Georgia      | NH Black    | 3.099  | 1.113  | 2.8          |
| Georgia      | NH Asian    | 0.153  | 0.044  | 3.5          |
| Georgia      | NH 2+ races | 0.016  | 0.011  | NA           |
| Georgia      | NH AIAN     | 0.000  | 0.019  | NA           |
| Georgia      | NH NHPI     | 0.016  | 0.000  | NA           |
| Hawaii       | All races   | 1.632  | 1.280  | 1.3          |
| Hawaii       | NH White    | 0.102  | 0.077  | NA           |
| Hawaii       | Hispanic    | 0.102  | 0.303  | NA           |
| Hawaii       | NH Black    | 0.102  | 0.025  | NA           |
| Hawaii       | NH Asian    | 0.694  | 0.476  | 1.5          |
| Hawaii       | NH 2+ races | 0.102  | 0.131  | NA           |
| Hawaii       | NH AIAN     | 0.000  | 0.000  | NA           |
| Hawaii       | NH NHPI     | 0.530  | 0.306  | 1.7          |
| Idaho        | All races   | 4.604  | 1.329  | 3.5          |
| Idaho        | NH White    | 3.588  | 0.719  | 5.0          |
| Idaho        | Hispanic    | 0.699  | 0.345  | 2.0          |
| Idaho        | NH Black    | 0.079  | 0.046  | NA           |
| Idaho        | NH Asian    | 0.079  | 0.094  | NA           |
| Idaho        | NH 2+ races | 0.079  | 0.056  | NA           |
| Idaho        | NH AIAN     | 0.079  | 0.173  | NA           |
| Idaho        | NH NHPI     | NA     | 0.000  | NA           |
| Illinois     | All races   | 7.528  | 2.257  | 3.3          |
| Illinois     | NH White    | 3.842  | 0.557  | 6.9          |
| Illinois     | Hispanic    | 1.495  | 1.025  | 1.5          |
| Illinois     | NH Black    | 1.841  | 0.555  | 3.3          |
| Illinois     | NH Asian    | 0.311  | 0.091  | 3.4          |
| Illinois     | NH 2+ races | 0.012  | 0.033  | NA           |
| Illinois     | NH AIAN     | 0.012  | 0.007  | NA           |
| Illinois     | NH NHPI     | NA     | 0.000  | NA           |
| Indiana      | All races   | 6.703  | 1.501  | 4.5          |
| Indiana      | NH White    | 5.294  | 0.903  | 5.9          |

| <b>State</b> | <b>Race</b> | $YS_j$ | $YF_j$ | <b>Ratio</b> |
|--------------|-------------|--------|--------|--------------|
| Indiana      | Hispanic    | 0.350  | 0.176  | 2.0          |
| Indiana      | NH Black    | 0.948  | 0.318  | 3.0          |
| Indiana      | NH Asian    | 0.049  | 0.023  | NA           |
| Indiana      | NH 2+ races | 0.021  | 0.023  | NA           |
| Indiana      | NH AIAN     | 0.021  | 0.019  | NA           |
| Indiana      | NH NHPI     | 0.021  | NA     | NA           |
| Iowa         | All races   | 5.949  | 1.889  | 3.1          |
| Iowa         | NH White    | 5.226  | 1.204  | 4.3          |
| Iowa         | Hispanic    | 0.228  | 0.196  | 1.2          |
| Iowa         | NH Black    | 0.244  | 0.296  | 0.8          |
| Iowa         | NH Asian    | 0.130  | 0.038  | 3.4          |
| Iowa         | NH 2+ races | 0.041  | 0.039  | NA           |
| Iowa         | NH AIAN     | 0.041  | 0.067  | NA           |
| Iowa         | NH NHPI     | 0.041  | 0.000  | NA           |
| Kansas       | All races   | 5.369  | 1.832  | 2.9          |
| Kansas       | NH White    | 3.989  | 0.837  | 4.8          |
| Kansas       | Hispanic    | 0.645  | 0.457  | 1.4          |
| Kansas       | NH Black    | 0.417  | 0.263  | 1.6          |
| Kansas       | NH Asian    | 0.099  | 0.075  | NA           |
| Kansas       | NH 2+ races | 0.050  | 0.028  | NA           |
| Kansas       | NH AIAN     | 0.119  | 0.159  | NA           |
| Kansas       | NH NHPI     | NA     | NA     | NA           |
| Kentucky     | All races   | 5.007  | 1.098  | 4.6          |
| Kentucky     | NH White    | 4.148  | 0.730  | 5.7          |
| Kentucky     | Hispanic    | 0.090  | 0.167  | 0.5          |
| Kentucky     | NH Black    | 0.704  | 0.161  | 4.4          |
| Kentucky     | NH Asian    | 0.032  | 0.048  | NA           |
| Kentucky     | NH 2+ races | 0.000  | 0.000  | NA           |
| Kentucky     | NH AIAN     | 0.032  | 0.000  | NA           |
| Kentucky     | NH NHPI     | 0.000  | 0.000  | NA           |
| Louisiana    | All races   | 10.370 | 3.168  | 3.3          |
| Louisiana    | NH White    | 4.933  | 0.874  | 5.6          |
| Louisiana    | Hispanic    | 0.276  | 0.229  | 1.2          |
| Louisiana    | NH Black    | 5.057  | 2.087  | 2.4          |

| <b>State</b>  | <b>Race</b> | $YS_j$ | $YF_j$ | <b>Ratio</b> |
|---------------|-------------|--------|--------|--------------|
| Louisiana     | NH Asian    | 0.034  | 0.062  | NA           |
| Louisiana     | NH 2+ races | 0.034  | 0.000  | NA           |
| Louisiana     | NH AIAN     | 0.034  | 0.048  | NA           |
| Louisiana     | NH NHPI     | NA     | NA     | NA           |
| Maine         | All races   | 1.056  | 0.380  | 2.8          |
| Maine         | NH White    | 0.861  | 0.229  | 3.8          |
| Maine         | Hispanic    | 0.065  | 0.000  | NA           |
| Maine         | NH Black    | 0.065  | 0.131  | NA           |
| Maine         | NH Asian    | 0.000  | 0.000  | NA           |
| Maine         | NH 2+ races | 0.065  | 0.000  | NA           |
| Maine         | NH AIAN     | 0.000  | 0.000  | NA           |
| Maine         | NH NHPI     | NA     | NA     | NA           |
| Maryland      | All races   | 6.186  | 2.031  | 3.0          |
| Maryland      | NH White    | 2.392  | 0.401  | 6.0          |
| Maryland      | Hispanic    | 0.607  | 0.658  | 0.9          |
| Maryland      | NH Black    | 2.883  | 0.861  | 3.3          |
| Maryland      | NH Asian    | 0.253  | 0.101  | 2.5          |
| Maryland      | NH 2+ races | 0.025  | 0.014  | NA           |
| Maryland      | NH AIAN     | 0.025  | 0.000  | NA           |
| Maryland      | NH NHPI     | NA     | 0.000  | NA           |
| Massachusetts | All races   | 5.709  | 1.350  | 4.2          |
| Massachusetts | NH White    | 4.201  | 0.661  | 6.4          |
| Massachusetts | Hispanic    | 0.599  | 0.335  | 1.8          |
| Massachusetts | NH Black    | 0.625  | 0.258  | 2.4          |
| Massachusetts | NH Asian    | 0.246  | 0.067  | 3.7          |
| Massachusetts | NH 2+ races | 0.019  | 0.023  | NA           |
| Massachusetts | NH AIAN     | 0.019  | 0.001  | NA           |
| Massachusetts | NH NHPI     | 0.000  | 0.000  | NA           |
| Michigan      | All races   | 7.264  | 1.892  | 3.8          |
| Michigan      | NH White    | 4.371  | 0.820  | 5.3          |
| Michigan      | Hispanic    | 0.264  | 0.154  | 1.7          |
| Michigan      | NH Black    | 2.452  | 0.882  | 2.8          |
| Michigan      | NH Asian    | 0.102  | 0.022  | 4.7          |
| Michigan      | NH 2+ races | 0.015  | 0.013  | NA           |

| <b>State</b> | <b>Race</b> | $YS_j$ | $YF_j$ | <b>Ratio</b> |
|--------------|-------------|--------|--------|--------------|
| Michigan     | NH AIAN     | 0.046  | 0.024  | 1.9          |
| Michigan     | NH NHPI     | NA     | NA     | NA           |
| Minnesota    | All races   | 3.979  | 1.084  | 3.7          |
| Minnesota    | NH White    | 3.131  | 0.466  | 6.7          |
| Minnesota    | Hispanic    | 0.123  | 0.177  | 0.7          |
| Minnesota    | NH Black    | 0.378  | 0.211  | 1.8          |
| Minnesota    | NH Asian    | 0.246  | 0.114  | 2.2          |
| Minnesota    | NH 2+ races | 0.023  | 0.024  | NA           |
| Minnesota    | NH AIAN     | 0.077  | 0.112  | 0.7          |
| Minnesota    | NH NHPI     | NA     | NA     | NA           |
| Mississippi  | All races   | 11.983 | 4.173  | 2.9          |
| Mississippi  | NH White    | 5.749  | 1.152  | 5.0          |
| Mississippi  | Hispanic    | 0.053  | 0.171  | NA           |
| Mississippi  | NH Black    | 5.802  | 2.558  | 2.3          |
| Mississippi  | NH Asian    | 0.126  | 0.067  | 1.9          |
| Mississippi  | NH 2+ races | 0.053  | 0.015  | NA           |
| Mississippi  | NH AIAN     | 0.200  | 0.292  | 0.7          |
| Mississippi  | NH NHPI     | NA     | NA     | NA           |
| Missouri     | All races   | 6.345  | 1.474  | 4.3          |
| Missouri     | NH White    | 4.930  | 0.875  | 5.6          |
| Missouri     | Hispanic    | 0.174  | 0.170  | 1.0          |
| Missouri     | NH Black    | 1.076  | 0.356  | 3.0          |
| Missouri     | NH Asian    | 0.096  | 0.026  | 3.6          |
| Missouri     | NH 2+ races | 0.023  | 0.011  | NA           |
| Missouri     | NH AIAN     | 0.023  | 0.005  | NA           |
| Missouri     | NH NHPI     | 0.023  | 0.018  | NA           |
| Montana      | All races   | 5.415  | 2.234  | 2.4          |
| Montana      | NH White    | 3.360  | 0.836  | 4.0          |
| Montana      | Hispanic    | 0.243  | 0.206  | NA           |
| Montana      | NH Black    | 0.111  | 0.000  | NA           |
| Montana      | NH Asian    | 0.111  | 0.053  | NA           |
| Montana      | NH 2+ races | 0.111  | 0.058  | NA           |
| Montana      | NH AIAN     | 1.481  | 0.884  | 1.7          |
| Montana      | NH NHPI     | NA     | NA     | NA           |

| <b>State</b>  | <b>Race</b> | $YS_j$ | $YF_j$ | <b>Ratio</b> |
|---------------|-------------|--------|--------|--------------|
| Nebraska      | All races   | 5.797  | 2.152  | 2.7          |
| Nebraska      | NH White    | 4.650  | 1.064  | 4.4          |
| Nebraska      | Hispanic    | 0.619  | 0.530  | 1.2          |
| Nebraska      | NH Black    | 0.302  | 0.350  | 0.9          |
| Nebraska      | NH Asian    | 0.075  | 0.116  | NA           |
| Nebraska      | NH 2+ races | 0.075  | 0.035  | NA           |
| Nebraska      | NH AIAN     | 0.075  | 0.118  | NA           |
| Nebraska      | NH NHPI     | NA     | NA     | NA           |
| Nevada        | All races   | 7.728  | 3.126  | 2.5          |
| Nevada        | NH White    | 3.565  | 0.638  | 5.6          |
| Nevada        | Hispanic    | 1.961  | 1.624  | 1.2          |
| Nevada        | NH Black    | 0.839  | 0.394  | 2.1          |
| Nevada        | NH Asian    | 1.122  | 0.273  | 4.1          |
| Nevada        | NH 2+ races | 0.052  | 0.098  | NA           |
| Nevada        | NH AIAN     | 0.136  | 0.066  | 2.1          |
| Nevada        | NH NHPI     | 0.052  | 0.203  | NA           |
| New Hampshire | All races   | 1.678  | 0.656  | 2.6          |
| New Hampshire | NH White    | 1.463  | 0.515  | 2.8          |
| New Hampshire | Hispanic    | 0.072  | 0.014  | NA           |
| New Hampshire | NH Black    | 0.072  | 0.054  | NA           |
| New Hampshire | NH Asian    | 0.072  | 0.071  | NA           |
| New Hampshire | NH 2+ races | 0.000  | 0.000  | NA           |
| New Hampshire | NH AIAN     | 0.000  | 0.000  | NA           |
| New Hampshire | NH NHPI     | NA     | NA     | NA           |
| New Jersey    | All races   | 12.045 | 4.409  | 2.7          |
| New Jersey    | NH White    | 5.687  | 1.238  | 4.6          |
| New Jersey    | Hispanic    | 2.831  | 1.728  | 1.6          |
| New Jersey    | NH Black    | 2.544  | 1.019  | 2.5          |
| New Jersey    | NH Asian    | 0.888  | 0.252  | 3.5          |
| New Jersey    | NH 2+ races | 0.060  | 0.036  | 1.6          |
| New Jersey    | NH AIAN     | 0.018  | 0.000  | NA           |
| New Jersey    | NH NHPI     | 0.018  | NA     | NA           |
| New Mexico    | All races   | 6.221  | 3.598  | 1.7          |
| New Mexico    | NH White    | 1.328  | 0.306  | 4.3          |

| <b>State</b>   | <b>Race</b> | $YS_j$ | $YF_j$ | <b>Ratio</b> |
|----------------|-------------|--------|--------|--------------|
| New Mexico     | Hispanic    | 2.447  | 1.290  | 1.9          |
| New Mexico     | NH Black    | 0.065  | 0.111  | NA           |
| New Mexico     | NH Asian    | 0.065  | 0.007  | NA           |
| New Mexico     | NH 2+ races | 0.065  | 0.184  | NA           |
| New Mexico     | NH AIAN     | 2.252  | 1.970  | 1.1          |
| New Mexico     | NH NHPI     | 0.000  | NA     | NA           |
| New York       | All races   | 13.220 | 4.529  | 2.9          |
| New York       | NH White    | 4.971  | 0.930  | 5.3          |
| New York       | Hispanic    | 3.479  | 1.991  | 1.7          |
| New York       | NH Black    | 3.537  | 1.016  | 3.5          |
| New York       | NH Asian    | 1.182  | 0.547  | 2.2          |
| New York       | NH 2+ races | 0.024  | 0.025  | 1.0          |
| New York       | NH AIAN     | 0.020  | 0.025  | 0.8          |
| New York       | NH NHPI     | 0.008  | 0.024  | NA           |
| North Carolina | All races   | 2.240  | 0.718  | 3.1          |
| North Carolina | NH White    | 1.116  | 0.224  | 5.0          |
| North Carolina | Hispanic    | 0.201  | 0.172  | 1.2          |
| North Carolina | NH Black    | 0.844  | 0.268  | 3.2          |
| North Carolina | NH Asian    | 0.041  | 0.015  | 2.8          |
| North Carolina | NH 2+ races | 0.000  | 0.000  | NA           |
| North Carolina | NH AIAN     | 0.038  | 0.008  | NA           |
| North Carolina | NH NHPI     | 0.000  | 0.003  | NA           |
| North Dakota   | All races   | 9.341  | 3.399  | 2.7          |
| North Dakota   | NH White    | 7.440  | 1.848  | 4.0          |
| North Dakota   | Hispanic    | 0.207  | 0.448  | NA           |
| North Dakota   | NH Black    | 0.207  | 0.000  | NA           |
| North Dakota   | NH Asian    | 0.207  | 0.000  | NA           |
| North Dakota   | NH 2+ races | 0.000  | 0.028  | NA           |
| North Dakota   | NH AIAN     | 1.281  | 0.680  | 1.9          |
| North Dakota   | NH NHPI     | 0.000  | NA     | NA           |
| Ohio           | All races   | 4.857  | 1.061  | 4.6          |
| Ohio           | NH White    | 3.849  | 0.700  | 5.5          |
| Ohio           | Hispanic    | 0.084  | 0.064  | 1.3          |
| Ohio           | NH Black    | 0.848  | 0.215  | 3.9          |

| <b>State</b> | <b>Race</b> | $YS_j$ | $YF_j$ | <b>Ratio</b> |
|--------------|-------------|--------|--------|--------------|
| Ohio         | NH Asian    | 0.053  | 0.022  | 2.5          |
| Ohio         | NH 2+ races | 0.011  | 0.025  | NA           |
| Ohio         | NH AIAN     | 0.011  | 0.017  | NA           |
| Ohio         | NH NHPI     | 0.000  | 0.000  | NA           |
| Oklahoma     | All races   | 6.690  | 1.658  | 4.0          |
| Oklahoma     | NH White    | 4.468  | 0.756  | 5.9          |
| Oklahoma     | Hispanic    | 0.485  | 0.340  | 1.4          |
| Oklahoma     | NH Black    | 0.501  | 0.152  | 3.3          |
| Oklahoma     | NH Asian    | 0.105  | 0.051  | 2.1          |
| Oklahoma     | NH 2+ races | 0.186  | 0.027  | NA           |
| Oklahoma     | NH AIAN     | 0.905  | 0.323  | 2.8          |
| Oklahoma     | NH NHPI     | 0.040  | 0.108  | NA           |
| Oregon       | All races   | 1.273  | 0.617  | 2.1          |
| Oregon       | NH White    | 0.904  | 0.215  | 4.2          |
| Oregon       | Hispanic    | 0.207  | 0.210  | 1.0          |
| Oregon       | NH Black    | 0.029  | 0.051  | NA           |
| Oregon       | NH Asian    | 0.075  | 0.043  | 1.8          |
| Oregon       | NH 2+ races | 0.000  | 0.018  | NA           |
| Oregon       | NH AIAN     | 0.029  | 0.043  | NA           |
| Oregon       | NH NHPI     | 0.029  | 0.039  | NA           |
| Pennsylvania | All races   | 5.631  | 1.398  | 4.0          |
| Pennsylvania | NH White    | 3.874  | 0.719  | 5.4          |
| Pennsylvania | Hispanic    | 0.372  | 0.185  | 2.0          |
| Pennsylvania | NH Black    | 1.205  | 0.407  | 3.0          |
| Pennsylvania | NH Asian    | 0.160  | 0.056  | 2.9          |
| Pennsylvania | NH 2+ races | 0.010  | 0.015  | NA           |
| Pennsylvania | NH AIAN     | 0.010  | 0.000  | NA           |
| Pennsylvania | NH NHPI     | 0.000  | NA     | NA           |
| Rhode Island | All races   | 6.418  | 1.677  | 3.8          |
| Rhode Island | NH White    | 4.687  | 0.755  | 6.2          |
| Rhode Island | Hispanic    | 0.877  | 0.165  | 5.3          |
| Rhode Island | NH Black    | 0.508  | 0.177  | 2.9          |
| Rhode Island | NH Asian    | 0.115  | 0.207  | NA           |
| Rhode Island | NH 2+ races | 0.115  | 0.021  | NA           |

| <b>State</b>   | <b>Race</b> | $YS_j$ | $YF_j$ | <b>Ratio</b> |
|----------------|-------------|--------|--------|--------------|
| Rhode Island   | NH AIAN     | 0.115  | NA     | NA           |
| Rhode Island   | NH NHPI     | NA     | NA     | NA           |
| South Carolina | All races   | 6.127  | 1.841  | 3.3          |
| South Carolina | NH White    | 3.288  | 0.652  | 5.0          |
| South Carolina | Hispanic    | 0.132  | 0.160  | 0.8          |
| South Carolina | NH Black    | 2.628  | 0.868  | 3.0          |
| South Carolina | NH Asian    | 0.026  | 0.047  | NA           |
| South Carolina | NH 2+ races | 0.026  | 0.000  | NA           |
| South Carolina | NH AIAN     | 0.026  | 0.006  | NA           |
| South Carolina | NH NHPI     | 0.000  | 0.011  | NA           |
| South Dakota   | All races   | 8.706  | 3.192  | 2.7          |
| South Dakota   | NH White    | 6.407  | 1.269  | 5.0          |
| South Dakota   | Hispanic    | 0.153  | 0.614  | NA           |
| South Dakota   | NH Black    | 0.153  | 0.190  | NA           |
| South Dakota   | NH Asian    | 0.153  | 0.407  | NA           |
| South Dakota   | NH 2+ races | 0.153  | 0.161  | NA           |
| South Dakota   | NH AIAN     | 1.686  | 0.627  | 2.7          |
| South Dakota   | NH NHPI     | 0.000  | NA     | NA           |
| Tennessee      | All races   | 7.117  | 1.950  | 3.6          |
| Tennessee      | NH White    | 5.235  | 0.967  | 5.4          |
| Tennessee      | Hispanic    | 0.219  | 0.249  | 0.9          |
| Tennessee      | NH Black    | 1.560  | 0.624  | 2.5          |
| Tennessee      | NH Asian    | 0.058  | 0.037  | 1.6          |
| Tennessee      | NH 2+ races | 0.022  | 0.011  | NA           |
| Tennessee      | NH AIAN     | 0.022  | 0.020  | NA           |
| Tennessee      | NH NHPI     | 0.000  | 0.099  | NA           |
| Texas          | All races   | 9.657  | 2.946  | 3.3          |
| Texas          | NH White    | 3.087  | 0.550  | 5.6          |
| Texas          | Hispanic    | 5.270  | 2.020  | 2.6          |
| Texas          | NH Black    | 1.081  | 0.315  | 3.4          |
| Texas          | NH Asian    | 0.190  | 0.039  | 4.9          |
| Texas          | NH 2+ races | 0.007  | 0.005  | NA           |
| Texas          | NH AIAN     | 0.015  | 0.015  | 1.0          |
| Texas          | NH NHPI     | 0.007  | 0.017  | NA           |



| <b>State</b>  | <b>Race</b> | $YS_j$ | $YF_j$ | <b>Ratio</b> |
|---------------|-------------|--------|--------|--------------|
| Utah          | All races   | 4.201  | 1.313  | 3.2          |
| Utah          | NH White    | 2.642  | 0.554  | 4.8          |
| Utah          | Hispanic    | 0.872  | 0.407  | 2.1          |
| Utah          | NH Black    | 0.066  | 0.010  | NA           |
| Utah          | NH Asian    | 0.145  | 0.052  | NA           |
| Utah          | NH 2+ races | 0.066  | 0.035  | NA           |
| Utah          | NH AIAN     | 0.264  | 0.114  | 2.3          |
| Utah          | NH NHPI     | 0.145  | 0.064  | NA           |
| Vermont       | All races   | 0.507  | 0.374  | 1.4          |
| Vermont       | NH White    | 0.507  | 0.313  | 1.6          |
| Vermont       | Hispanic    | 0.000  | 0.000  | NA           |
| Vermont       | NH Black    | 0.000  | 0.000  | NA           |
| Vermont       | NH Asian    | 0.000  | 0.000  | NA           |
| Vermont       | NH 2+ races | 0.000  | 0.000  | NA           |
| Vermont       | NH AIAN     | 0.000  | 0.000  | NA           |
| Vermont       | NH NHPI     | 0.000  | NA     | NA           |
| Virginia      | All races   | 3.790  | 1.025  | 3.7          |
| Virginia      | NH White    | 2.058  | 0.336  | 6.1          |
| Virginia      | Hispanic    | 0.334  | 0.265  | 1.3          |
| Virginia      | NH Black    | 1.217  | 0.378  | 3.2          |
| Virginia      | NH Asian    | 0.144  | 0.046  | 3.1          |
| Virginia      | NH 2+ races | 0.018  | 0.003  | NA           |
| Virginia      | NH AIAN     | 0.018  | 0.006  | NA           |
| Virginia      | NH NHPI     | 0.000  | 0.000  | NA           |
| Washington    | All races   | 2.481  | 0.863  | 2.9          |
| Washington    | NH White    | 1.619  | 0.287  | 5.6          |
| Washington    | Hispanic    | 0.397  | 0.232  | 1.7          |
| Washington    | NH Black    | 0.124  | 0.092  | 1.4          |
| Washington    | NH Asian    | 0.195  | 0.081  | 2.4          |
| Washington    | NH 2+ races | 0.019  | 0.035  | NA           |
| Washington    | NH AIAN     | 0.086  | 0.057  | 1.5          |
| Washington    | NH NHPI     | 0.041  | 0.055  | NA           |
| West Virginia | All races   | 3.337  | 0.739  | 4.5          |
| West Virginia | NH White    | 3.066  | 0.624  | 4.9          |

| <b>State</b>  | <b>Race</b> | $YS_j$ | $YF_j$ | <b>Ratio</b> |
|---------------|-------------|--------|--------|--------------|
| West Virginia | Hispanic    | 0.068  | 0.000  | NA           |
| West Virginia | NH Black    | 0.203  | 0.071  | NA           |
| West Virginia | NH Asian    | 0.000  | 0.010  | NA           |
| West Virginia | NH 2+ races | 0.000  | 0.000  | NA           |
| West Virginia | NH AIAN     | 0.000  | 0.062  | NA           |
| West Virginia | NH NHPI     | NA     | NA     | NA           |
| Wisconsin     | All races   | 5.192  | 1.328  | 3.9          |
| Wisconsin     | NH White    | 4.015  | 0.714  | 5.6          |
| Wisconsin     | Hispanic    | 0.427  | 0.297  | 1.4          |
| Wisconsin     | NH Black    | 0.466  | 0.168  | 2.8          |
| Wisconsin     | NH Asian    | 0.123  | 0.076  | 1.6          |
| Wisconsin     | NH 2+ races | 0.025  | 0.000  | NA           |
| Wisconsin     | NH AIAN     | 0.113  | 0.073  | 1.5          |
| Wisconsin     | NH NHPI     | 0.025  | 0.028  | NA           |
| Wyoming       | All races   | 3.410  | 1.876  | 1.8          |
| Wyoming       | NH White    | 2.436  | 0.575  | 4.2          |
| Wyoming       | Hispanic    | 0.221  | 0.323  | NA           |
| Wyoming       | NH Black    | 0.000  | 0.000  | NA           |
| Wyoming       | NH Asian    | 0.221  | 0.201  | NA           |
| Wyoming       | NH 2+ races | 0.000  | 0.024  | NA           |
| Wyoming       | NH AIAN     | 0.532  | 0.754  | NA           |
| Wyoming       | NH NHPI     | 0.000  | NA     | NA           |

## 2 References

1. WHO Global Health Observatory. Life tables by country - United States of America [Internet]. WHO. World Health Organization; [cited 2021 May 20]. Available from: <https://apps.who.int/gho/data/view.main.61780?lang=en>
